# Supplementary material
Source: Royal Society of Chemistry journal article supplement (doi:10.1039/d5cp04695e)
Supplement: d5cp04695e1.pdf [file d5cp04695e1.pdf]

The additional computational details are as follows. Lattice constants and cell shapes were optimized for all VASP calculations. Electronic self-consistent iterations were performed using the Normal (blocked Davidson) algorithm. All oxygen atoms were described using the same PAW potential (O, 08Apr2002). Even with these settings, some calculations did not converge in a single run and occasionally encountered convergence failures. In such cases, we restarted and repeated the calculations until they completed successfully. □

<Section 3.2>

|                                    | PAW                             | U - J  | AMIX    | Gaussian smearing | Magmomet |
|------------------------------------|---------------------------------|--------|---------|-------------------|----------|
| Ce <sub>32</sub> O <sub>64</sub>   | Ce 23Dec2003                    | 6.3000 | 0.20    | 0.05              | Not set  |
| Ce <sub>32</sub> O <sub>63</sub>   | Ce 23Dec2003                    | 6.3000 | 0.18    | 0.05              | #1       |
| Ce <sub>31</sub> MnO <sub>64</sub> | Ce 23Dec2003<br>Mn_pv 02Aug2007 | 4.0000 | 0.10    | 0.10              | Not set  |
| Ce <sub>31</sub> MnO <sub>63</sub> | Ce 23Dec2003<br>Mn_pv 02Aug2007 | 4.0000 | Not set | 0.10              | #2       |
| Ce <sub>31</sub> FeO <sub>64</sub> | Ce 23Dec2003<br>Fe 06Sep2000    | 4.6000 | 0.30    | 0.05              | #3       |
| Ce <sub>31</sub> CoO <sub>64</sub> | Ce 23Dec2003<br>Co 02Aug2007    | 5.0000 | 0.20    | 0.05              | #4       |
| Ce <sub>31</sub> NiO <sub>64</sub> | Ce 23Dec2003<br>Ni 02Aug2007    | 5.1000 | 0.20    | 0.05              | #5       |

#1< MAGMOM = -0.009 14\*0 -0.002 5\*0 -0.002 4\*0 -0.004 2\*0 -0.001 0 -0.001 3\*0 -0.002 ¥ 7\*0 -0.001 -0.004 2\*0 -0.001 -0.009 2\*0 -0.002 0 -0.002 -0.007 2\*0 -0.004 ¥ -0.001 -0.004 2\*-0.001 -0.002 0.972 3\*0.002 0.001 2\*0.002 0 2\*0.002 0 0.002 0 ¥ 0.015 2\*0 0.002 0 2\*0.002 2\*0 0.015 0 3\*0.002 0.972 0 2\*0.002 0.001>, #2< MAGMOM = 0 0.007 -0.001 0 -0.001 9\*0 0.007 4\*0 0.007 3\*0 -0.001 2\*0 0.007 -0.001 ¥ 5\*0 0.007 5\*0 -0.001 0 -0.001 2\*0 0.007 9\*0 0.008 0.007 7\*0 4.517 7\*0 0.007 ¥ 2\*0 0.007 0 0.002 0 2\*0.007 0 0.007 2\*0 0.002 0.007 0 0.007 0.002 2\*0.007 0 ¥ 3\*0.007>, #3< MAGMOM = 8\*0 0.086 -0.003 -0.304 0.065 -0.002 0.084 0.091 -0.232 0 -0.001 -0.006 ¥ 5\*-0.001 -0.002 0 -0.001 2\*0 -0.003 2\*-0.001 0 -0.001 -0.026 0 3\*-0.001 -0.012 ¥ 2\*0 -0.001 4\*0 -0.001 0 -0.001 -0.007 0 2\*-0.001 0 -0.002 0 -0.002 -0.001 0 ¥ -0.003 2\*0 -0.001 4.156 0 0.001 8\*0 0.001 3\*0 0.009 0.005 0 0.01 0 0.008 0 ¥ 0.035 0.009 0.001 0 0.008 0.013 0.012 0.01 -0.001 0.001>, #4< MAGMOM = 8\*0 0.004 3\*0.295 0.24 4\*0.001 4\*0.004 6\*0 0.003 0.002 2\*0.001 2\*0 ¥ 0.005 2\*0.004 0.005 4\*0 0.003 2\*0 0.002 0 2\*0.001 0 3\*0.004 0.005 5\*0 0.003 0 ¥ 0.002 0.001 0 0.001 3.172 15\*0 0.012 0.004 0.012 2\*0 0.004 2\*0.012 0.002 2\*0 ¥ 2\*0.012 0.004 2\*0.002>, #5< MAGMOM = 8\*0.001 2\*0.129 2\*0.016 2\*0.128 2\*0.016 2\*0.002 2\*0.001 2\*0.002 2\*0.001 ¥ 2\*0.003 2\*0.001 2\*0.003 2\*0.001 2\*0.002 2\*0.001 2\*0.002 2\*0.001 2\*0.003 ¥ 2\*0.001 2\*0.003 2\*0.001 2\*0.015 2\*0.004 2\*0.015 2\*0.004 2\*0.001 2\*0.002 ¥ 2\*0.001 2\*0.002 0.998 14\*0 4\*0.003 0 2\*0.002 4\*0 0.002 0 0.002 2\*0 -0.001>

<Section 3.3>

All calculations were performed with ISPIN = 2, Gaussian smearing 0.1. When convergence issues were encountered, initial magnetic moments (MAGMOM) were specified. The MAGMOM settings were as follows: Ce<sub>7</sub>MoO<sub>15</sub> <MAGMOM = 0.006 0.993 0.994 0.008 0.031 0.986 0.987 -0.012 -0.002 -0.007 -0.002 ¥ -0.007 -0.005 -0.004 -0.002 -0.007 -0.006 -0.008 -0.006 -0.008 -0.001 -0.01 ¥ 0.009>, Ce<sub>6</sub>Fe<sub>2</sub>O<sub>15</sub> <MAGMOM = 2\*3 21\*0>, Ce<sub>6</sub>Cu<sub>2</sub>O<sub>16</sub> <MAGMOM = 2\*1 22\*0>

| dopant           | PAW             | U - J   | AMIX<br>(Ce <sub>7</sub> MO <sub>16</sub> ) | AMIX<br>(Ce <sub>7</sub> MO <sub>15</sub> ) |
|------------------|-----------------|---------|---------------------------------------------|---------------------------------------------|
| <b>Ce (pure)</b> | Ce 23Dec2003    | 6.3000  | 0.20                                        | 0.10                                        |
| <b>Ti</b>        | Ti_sv 26Sep2005 | 4.4000  | 0.22                                        | Not set                                     |
| <b>V</b>         | V_sv 02Aug2007  | 2.7000  | 0.22                                        | 0.22                                        |
| <b>Cr</b>        | Cr_pv 02Aug2007 | 3.5000  | 0.22                                        | 0.22                                        |
| <b>Mn</b>        | Mn_pv 02Aug2007 | 4.0000  | 0.22                                        | 0.20                                        |
| <b>Fe</b>        | Fe_pv 02Aug2007 | 4.6000  | Not set                                     | Not set                                     |
| <b>Co</b>        | Co 02Aug2007    | 5.0000  | Not set                                     | Not set                                     |
| <b>Ni</b>        | Ni_pv 06Sep2000 | 5.1000  | Not set                                     | Not set                                     |
| <b>Cu</b>        | Cu_pv 06Sep2000 | 4.0000  | Not set                                     | Not set                                     |
| <b>Zn</b>        | Zn 06Sep2000    | 7.5000  | Not set                                     | Not set                                     |
| <b>Zr</b>        | Zr_sv 04Jan2005 | Not set | Not set                                     | Not set                                     |
| <b>Nb</b>        | Nb_sv 25May2007 | 2.1000  | Not set                                     | Not set                                     |
| <b>Mo</b>        | Mo_pv 04Feb2005 | 2.4000  | Not set                                     | 0.22                                        |
| <b>Ru</b>        | Ru_pv 28Jan2005 | 3.0000  | Not set                                     | Not set                                     |
| <b>Rh</b>        | Rh_pv 25Jan2005 | 3.3000  | Not set                                     | Not set                                     |
| <b>Pd</b>        | Pd 04Jan2005    | 3.6000  | Not set                                     | Not set                                     |
| <b>Hf</b>        | Hf_pv 06Sep2000 | Not set | Not set                                     | Not set                                     |

| dopant           | PAW             | U - J   | AMIX<br>(Ce <sub>6</sub> M <sub>2</sub> O <sub>16</sub> ) | AMIX<br>(Ce <sub>6</sub> M <sub>2</sub> O <sub>15</sub> ) |
|------------------|-----------------|---------|-----------------------------------------------------------|-----------------------------------------------------------|
| <b>Ce (pure)</b> | Ce 23Dec2003    | 6.3000  | 0.20                                                      | 0.10                                                      |
| <b>Ti</b>        | Ti_sv 26Sep2005 | 4.4000  | 0.10                                                      | 0.10                                                      |
| <b>V</b>         | V_sv 02Aug2007  | 2.7000  | 0.10                                                      | 0.10                                                      |
| <b>Cr</b>        | Cr_pv 02Aug2007 | 3.5000  | 0.10                                                      | 0.10                                                      |
| <b>Mn</b>        | Mn_pv 02Aug2007 | 4.0000  | Not set                                                   | 0.10                                                      |
| <b>Fe</b>        | Fe_pv 02Aug2007 | 4.6000  | 0.10                                                      | 0.10                                                      |
| <b>Co</b>        | Co 02Aug2007    | 5.0000  | 0.10                                                      | 0.10                                                      |
| <b>Ni</b>        | Ni_pv 06Sep2000 | 5.1000  | 0.10                                                      | 0.05                                                      |
| <b>Cu</b>        | Cu_pv 06Sep2000 | 4.0000  | 0.10                                                      | 0.05                                                      |
| <b>Zn</b>        | Zn 06Sep2000    | 7.5000  | 0.10                                                      | 0.10                                                      |
| <b>Zr</b>        | Zr_sv 04Jan2005 | Not set | 0.10                                                      | 0.10                                                      |
| <b>Nb</b>        | Nb_sv 25May2007 | 2.1000  | 0.10                                                      | 0.05                                                      |
| <b>Mo</b>        | Mo_pv 04Feb2005 | 2.4000  | 0.05                                                      | 0.05                                                      |
| <b>Ru</b>        | Ru_pv 28Jan2005 | 3.0000  | 0.10                                                      | 0.10                                                      |
| <b>Rh</b>        | Rh_pv 25Jan2005 | 3.3000  | 0.10                                                      | 0.10                                                      |
| <b>Pd</b>        | Pd 04Jan2005    | 3.6000  | 0.10                                                      | 0.10                                                      |
| <b>Hf</b>        | Hf_pv 06Sep2000 | Not set | 0.10                                                      | 0.10                                                      |

The following thermodynamic functions are obtained from the phonon density of states within the harmonic approximation.

<Section 3.2>

Definitions:

$C_v$  : vibrational heat capacity at constant volume

$E_{\text{vib}}(T) = E(T) - E(0)$  : the change in vibrational internal energy from 0 K, where

$E(0) = E_{\text{elec}} + \text{ZPE}$  is the electronic energy of formation  $E_{\text{elec}}$  plus the zero point energy

$S(T)$  : the vibrational entropy at temperature T

$-(A(T) - E(0))$  : the change in the vibrational Helmholtz free energy from 0 K

$E(T)$  : the electronic energy of formation plus the vibrational internal energy,

so this term is  $E_{\text{elec}} + \text{ZPE} + E_{\text{vib}}(T)$

$A(T)$  : the electronic plus vibrational Helmholtz free energy,  $E(T) - TS(T)$

Note that the electronic energy, which is part of the enthalpy and free energies, is set to zero because the reference energies of the elements in their standard state are unavailable.

Thermodynamic Properties for empirical formula **CeO<sub>2</sub>** unit

Zero-point energy = 16.17 kJ/mol

| T<br>K | $C_v$<br>J K <sup>-1</sup> mol <sup>-1</sup> | $E(T) - E(0)$<br>kJ mol <sup>-1</sup> | $S(T)$<br>J K <sup>-1</sup> mol <sup>-1</sup> | $-(A(T) - E(0))$<br>kJ mol <sup>-1</sup> | $E(T)$<br>kJ mol <sup>-1</sup> | $A(T)$<br>kJ mol <sup>-1</sup> |
|--------|----------------------------------------------|---------------------------------------|-----------------------------------------------|------------------------------------------|--------------------------------|--------------------------------|
| 0      | 0.0000                                       | 0.0000                                | 0.0000                                        | 0.0000                                   | 16.1678                        | 16.1678                        |
| 1      | 0.0000                                       | 0.0000                                | 0.0000                                        | 0.0000                                   | 16.1678                        | 16.1678                        |
| 2      | 0.0001                                       | 0.0000                                | 0.0000                                        | 0.0000                                   | 16.1678                        | 16.1678                        |
| 3      | 0.0012                                       | 0.0000                                | 0.0002                                        | 0.0000                                   | 16.1678                        | 16.1678                        |
| 4      | 0.0039                                       | 0.0000                                | 0.0009                                        | 0.0000                                   | 16.1678                        | 16.1678                        |
| 5      | 0.0083                                       | 0.0000                                | 0.0022                                        | 0.0000                                   | 16.1679                        | 16.1678                        |
| 10     | 0.0527                                       | 0.0001                                | 0.0194                                        | 0.0001                                   | 16.1680                        | 16.1678                        |
| 15     | 0.1746                                       | 0.0007                                | 0.0593                                        | 0.0002                                   | 16.1685                        | 16.1676                        |
| 20     | 0.5233                                       | 0.0023                                | 0.1498                                        | 0.0007                                   | 16.1701                        | 16.1671                        |
| 25     | 1.2282                                       | 0.0065                                | 0.3353                                        | 0.0019                                   | 16.1743                        | 16.1659                        |
| 30     | 2.2881                                       | 0.0151                                | 0.6480                                        | 0.0043                                   | 16.1830                        | 16.1635                        |
| 35     | 3.6244                                       | 0.0298                                | 1.0981                                        | 0.0086                                   | 16.1977                        | 16.1592                        |
| 40     | 5.1511                                       | 0.0517                                | 1.6800                                        | 0.0155                                   | 16.2195                        | 16.1523                        |
| 45     | 6.8010                                       | 0.0815                                | 2.3811                                        | 0.0256                                   | 16.2494                        | 16.1422                        |
| 50     | 8.5279                                       | 0.1198                                | 3.1865                                        | 0.0395                                   | 16.2877                        | 16.1284                        |

|     |         |         |         |        |         |         |
|-----|---------|---------|---------|--------|---------|---------|
| 55  | 10.3013 | 0.1669  | 4.0822  | 0.0576 | 16.3347 | 16.1102 |
| 60  | 12.1007 | 0.2229  | 5.0555  | 0.0804 | 16.3907 | 16.0874 |
| 65  | 13.9121 | 0.2879  | 6.0956  | 0.1083 | 16.4558 | 16.0596 |
| 70  | 15.7251 | 0.3620  | 7.1929  | 0.1415 | 16.5299 | 16.0264 |
| 75  | 17.5317 | 0.4452  | 8.3395  | 0.1803 | 16.6130 | 15.9875 |
| 80  | 19.3252 | 0.5373  | 9.5283  | 0.2249 | 16.7052 | 15.9429 |
| 85  | 21.1000 | 0.6384  | 10.7533 | 0.2756 | 16.8062 | 15.8922 |
| 90  | 22.8507 | 0.7483  | 12.0090 | 0.3325 | 16.9161 | 15.8353 |
| 95  | 24.5728 | 0.8668  | 13.2907 | 0.3958 | 17.0347 | 15.7721 |
| 100 | 26.2622 | 0.9939  | 14.5943 | 0.4655 | 17.1618 | 15.7024 |
| 105 | 27.9152 | 1.1294  | 15.9157 | 0.5417 | 17.2972 | 15.6261 |
| 110 | 29.5287 | 1.2730  | 17.2517 | 0.6247 | 17.4409 | 15.5432 |
| 115 | 31.1002 | 1.4246  | 18.5992 | 0.7143 | 17.5925 | 15.4536 |
| 120 | 32.6277 | 1.5840  | 19.9552 | 0.8107 | 17.7518 | 15.3572 |
| 125 | 34.1094 | 1.7508  | 21.3174 | 0.9138 | 17.9187 | 15.2540 |
| 130 | 35.5443 | 1.9250  | 22.6833 | 1.0238 | 18.0928 | 15.1440 |
| 135 | 36.9318 | 2.1062  | 24.0509 | 1.1407 | 18.2740 | 15.0272 |
| 140 | 38.2715 | 2.2942  | 25.4184 | 1.2643 | 18.4620 | 14.9035 |
| 145 | 39.5634 | 2.4888  | 26.7840 | 1.3948 | 18.6567 | 14.7730 |
| 150 | 40.8080 | 2.6898  | 28.1464 | 1.5322 | 18.8576 | 14.6357 |
| 155 | 42.0057 | 2.8968  | 29.5041 | 1.6763 | 19.0647 | 14.4915 |
| 160 | 43.1575 | 3.1097  | 30.8561 | 1.8272 | 19.2776 | 14.3406 |
| 165 | 44.2642 | 3.3283  | 32.2012 | 1.9848 | 19.4961 | 14.1830 |
| 170 | 45.3270 | 3.5523  | 33.5385 | 2.1492 | 19.7201 | 14.0186 |
| 175 | 46.3471 | 3.7815  | 34.8672 | 2.3202 | 19.9493 | 13.8476 |
| 180 | 47.3258 | 4.0157  | 36.1867 | 2.4979 | 20.1835 | 13.6700 |
| 185 | 48.2645 | 4.2547  | 37.4962 | 2.6821 | 20.4225 | 13.4858 |
| 190 | 49.1646 | 4.4983  | 38.7954 | 2.8728 | 20.6661 | 13.2950 |
| 195 | 50.0275 | 4.7463  | 40.0837 | 3.0700 | 20.9141 | 13.0978 |
| 200 | 50.8546 | 4.9985  | 41.3608 | 3.2736 | 21.1663 | 12.8942 |
| 205 | 51.6474 | 5.2548  | 42.6263 | 3.4836 | 21.4226 | 12.6843 |
| 210 | 52.4073 | 5.5149  | 43.8801 | 3.6999 | 21.6827 | 12.4680 |
| 215 | 53.1357 | 5.7788  | 45.1219 | 3.9224 | 21.9466 | 12.2455 |
| 220 | 53.8338 | 6.0462  | 46.3515 | 4.1510 | 22.2141 | 12.0168 |
| 225 | 54.5030 | 6.3171  | 47.5688 | 4.3859 | 22.4849 | 11.7820 |
| 230 | 55.1447 | 6.5912  | 48.7738 | 4.6267 | 22.7590 | 11.5411 |
| 235 | 55.7599 | 6.8685  | 49.9664 | 4.8736 | 23.0363 | 11.2943 |
| 240 | 56.3500 | 7.1488  | 51.1466 | 5.1264 | 23.3166 | 11.0415 |
| 245 | 56.9160 | 7.4319  | 52.3143 | 5.3850 | 23.5998 | 10.7828 |
| 250 | 57.4590 | 7.7179  | 53.4697 | 5.6495 | 23.8857 | 10.5184 |
| 255 | 57.9802 | 8.0065  | 54.6127 | 5.9197 | 24.1743 | 10.2482 |
| 260 | 58.4804 | 8.2976  | 55.7434 | 6.1956 | 24.4655 | 9.9723  |
| 265 | 58.9607 | 8.5912  | 56.8620 | 6.4771 | 24.7591 | 9.6907  |
| 270 | 59.4220 | 8.8872  | 57.9684 | 6.7642 | 25.0550 | 9.4037  |
| 273 | 59.7033 | 9.0748  | 58.6593 | 6.9479 | 25.2427 | 9.2200  |
| 275 | 59.8652 | 9.1854  | 59.0628 | 7.0568 | 25.3533 | 9.1111  |
| 277 | 60.0504 | 9.3143  | 59.5298 | 7.1842 | 25.4822 | 8.9836  |
| 280 | 60.2911 | 9.4858  | 60.1454 | 7.3548 | 25.6537 | 8.8131  |
| 285 | 60.7004 | 9.7883  | 61.2161 | 7.6582 | 25.9561 | 8.5097  |
| 290 | 61.0941 | 10.0928 | 62.2752 | 7.9669 | 26.2606 | 8.2009  |
| 294 | 61.3681 | 10.3132 | 63.0307 | 8.1925 | 26.4811 | 7.9754  |
| 295 | 61.4727 | 10.3992 | 63.3228 | 8.2809 | 26.5671 | 7.8869  |
| 296 | 61.5466 | 10.4607 | 63.5310 | 8.3443 | 26.6286 | 7.8235  |
| 298 | 61.7038 | 10.5932 | 63.9770 | 8.4814 | 26.7611 | 7.6864  |
| 300 | 61.8369 | 10.7075 | 64.3591 | 8.6001 | 26.8753 | 7.5677  |

|      |         |          |          |          |          |           |
|------|---------|----------|----------|----------|----------|-----------|
| 310  | 62.5250 | 11.3293  | 66.3981  | 9.2539   | 27.4972  | 6.9139    |
| 320  | 63.1632 | 11.9578  | 68.3934  | 9.9279   | 28.1257  | 6.2399    |
| 330  | 63.7558 | 12.5924  | 70.3462  | 10.6217  | 28.7603  | 5.5462    |
| 340  | 64.3067 | 13.2328  | 72.2578  | 11.3347  | 29.4006  | 4.8331    |
| 350  | 64.8197 | 13.8784  | 74.1294  | 12.0667  | 30.0463  | 4.1012    |
| 360  | 65.2978 | 14.5291  | 75.9622  | 12.8172  | 30.6969  | 3.3507    |
| 370  | 65.7440 | 15.1843  | 77.7574  | 13.5858  | 31.3521  | 2.5821    |
| 373  | 65.8784 | 15.3916  | 78.3153  | 13.8316  | 31.5594  | 2.3362    |
| 380  | 66.1610 | 15.8438  | 79.5163  | 14.3722  | 32.0117  | 1.7957    |
| 390  | 66.5510 | 16.5074  | 81.2400  | 15.1760  | 32.6753  | 0.9919    |
| 400  | 66.9164 | 17.1748  | 82.9295  | 15.9969  | 33.3426  | 0.1710    |
| 425  | 67.7339 | 18.8582  | 87.0115  | 18.1215  | 35.0260  | -1.9537   |
| 450  | 68.4347 | 20.5605  | 90.9034  | 20.3458  | 36.7283  | -4.1780   |
| 475  | 69.0392 | 22.2791  | 94.6201  | 22.6652  | 38.4469  | -6.4974   |
| 500  | 69.5640 | 24.0117  | 98.1749  | 25.0754  | 40.1796  | -8.9076   |
| 525  | 70.0220 | 25.7567  | 101.5803 | 27.5727  | 41.9245  | -11.4048  |
| 550  | 70.4240 | 27.5124  | 104.8472 | 30.1533  | 43.6802  | -13.9854  |
| 575  | 70.7784 | 29.2775  | 107.9857 | 32.8139  | 45.4453  | -16.6461  |
| 600  | 71.0925 | 31.0509  | 111.0048 | 35.5515  | 47.2188  | -19.3837  |
| 650  | 71.6217 | 34.6192  | 116.7169 | 41.2463  | 50.7871  | -25.0784  |
| 700  | 72.0472 | 38.2113  | 122.0407 | 47.2167  | 54.3792  | -31.0488  |
| 750  | 72.3942 | 41.8226  | 127.0237 | 53.4446  | 57.9905  | -37.2767  |
| 800  | 72.6807 | 45.4497  | 131.7054 | 59.9140  | 61.6175  | -43.7461  |
| 850  | 72.9199 | 49.0899  | 136.1190 | 66.6106  | 65.2577  | -50.4427  |
| 900  | 73.1216 | 52.7410  | 140.2928 | 73.5218  | 68.9089  | -57.3539  |
| 950  | 73.2931 | 56.4015  | 144.2510 | 80.6362  | 72.5693  | -64.4683  |
| 1000 | 73.4402 | 60.0699  | 148.0144 | 87.9435  | 76.2377  | -71.7757  |
| 1050 | 73.5673 | 63.7451  | 151.6007 | 95.4346  | 79.9130  | -79.2667  |
| 1100 | 73.6778 | 67.4263  | 155.0257 | 103.1008 | 83.5941  | -86.9330  |
| 1150 | 73.7745 | 71.1127  | 158.3029 | 110.9346 | 87.2805  | -94.7667  |
| 1200 | 73.8595 | 74.8035  | 161.4445 | 118.9287 | 90.9714  | -102.7609 |
| 1250 | 73.9347 | 78.4984  | 164.4612 | 127.0768 | 94.6662  | -110.9090 |
| 1300 | 74.0015 | 82.1968  | 167.3623 | 135.3728 | 98.3647  | -119.2050 |
| 1350 | 74.0612 | 85.8984  | 170.1563 | 143.8112 | 102.0662 | -127.6434 |
| 1400 | 74.1146 | 89.6027  | 172.8507 | 152.3867 | 105.7706 | -136.2188 |
| 1450 | 74.1627 | 93.3097  | 175.4523 | 161.0946 | 109.4775 | -144.9267 |
| 1500 | 74.2061 | 97.0190  | 177.9673 | 169.9304 | 113.1868 | -153.7626 |
| 1550 | 74.2454 | 100.7302 | 180.4011 | 178.8898 | 116.8980 | -162.7220 |
| 1600 | 74.2812 | 104.4433 | 182.7590 | 187.9691 | 120.6112 | -171.8013 |
| 1650 | 74.3137 | 108.1582 | 185.0452 | 197.1644 | 124.3260 | -180.9966 |
| 1700 | 74.3435 | 111.8746 | 187.2641 | 206.4724 | 128.0425 | -190.3045 |
| 1750 | 74.3707 | 115.5925 | 189.4195 | 215.8896 | 131.7603 | -199.7218 |
| 1800 | 74.3958 | 119.3116 | 191.5151 | 225.4132 | 135.4795 | -209.2454 |
| 1850 | 74.4188 | 123.0320 | 193.5537 | 235.0401 | 139.1998 | -218.8723 |
| 1900 | 74.4401 | 126.7534 | 195.5386 | 244.7676 | 142.9213 | -228.5998 |
| 1950 | 74.4598 | 130.4759 | 197.4725 | 254.5930 | 146.6438 | -238.4251 |
| 2000 | 74.4780 | 134.1994 | 199.3579 | 264.5139 | 150.3672 | -248.3460 |
| 2050 | 74.4949 | 137.9236 | 201.1971 | 274.5279 | 154.0915 | -258.3601 |
| 2100 | 74.5106 | 141.6487 | 202.9924 | 284.6328 | 157.8166 | -268.4650 |
| 2150 | 74.5253 | 145.3747 | 204.7459 | 294.8264 | 161.5426 | -278.6585 |
| 2200 | 74.5389 | 149.1013 | 206.4594 | 305.1065 | 165.2691 | -288.9387 |
| 2250 | 74.5517 | 152.8285 | 208.1346 | 315.4714 | 168.9963 | -299.3036 |
| 2300 | 74.5636 | 156.5564 | 209.7733 | 325.9193 | 172.7242 | -309.7514 |
| 2350 | 74.5748 | 160.2848 | 211.3770 | 336.4480 | 176.4526 | -320.2802 |
| 2400 | 74.5853 | 164.0138 | 212.9472 | 347.0563 | 180.1817 | -330.8885 |

|      |         |          |          |          |          |           |
|------|---------|----------|----------|----------|----------|-----------|
| 2450 | 74.5952 | 167.7433 | 214.4852 | 357.7421 | 183.9111 | -341.5743 |
| 2500 | 74.6045 | 171.4732 | 215.9922 | 368.5041 | 187.6411 | -352.3363 |
| 2550 | 74.6132 | 175.2036 | 217.4698 | 379.3408 | 191.3715 | -363.1729 |
| 2600 | 74.6215 | 178.9345 | 218.9187 | 390.2505 | 195.1024 | -374.0826 |
| 2650 | 74.6293 | 182.6658 | 220.3401 | 401.2319 | 198.8336 | -385.0641 |
| 2700 | 74.6366 | 186.3974 | 221.7352 | 412.2839 | 202.5652 | -396.1161 |
| 2750 | 74.6436 | 190.1294 | 223.1048 | 423.4050 | 206.2973 | -407.2372 |
| 2800 | 74.6502 | 193.8617 | 224.4498 | 434.5939 | 210.0295 | -418.4260 |
| 2850 | 74.6565 | 197.5944 | 225.7711 | 445.8494 | 213.7622 | -429.6816 |
| 2900 | 74.6624 | 201.3273 | 227.0696 | 457.1704 | 217.4952 | -441.0026 |
| 2950 | 74.6680 | 205.0605 | 228.3459 | 468.5559 | 221.2284 | -452.3881 |
| 3000 | 74.6734 | 208.7940 | 229.6010 | 480.0046 | 224.9619 | -463.8367 |

Thermodynamic Properties for empirical formula  $\text{Ce}_{32}\text{O}_{63}$  unit

Zero-point energy = 507.73 kJ/mol

| T<br>K | Cv<br>J K <sup>-1</sup> mol <sup>-1</sup> | E(T) - E(0)<br>kJ mol <sup>-1</sup> | S(T)<br>J K <sup>-1</sup> mol <sup>-1</sup> | -(A(T) - E(0))<br>kJ mol <sup>-1</sup> | E(T)<br>kJ mol <sup>-1</sup> | A(T)<br>kJ mol <sup>-1</sup> |
|--------|-------------------------------------------|-------------------------------------|---------------------------------------------|----------------------------------------|------------------------------|------------------------------|
| 0      | 0.0000                                    | 0.0000                              | 0.0000                                      | 0.0000                                 | 507.7268                     | 507.7268                     |
| 1      | 0.0000                                    | 0.0000                              | 0.0000                                      | 0.0000                                 | 507.7268                     | 507.7268                     |
| 2      | 0.0001                                    | 0.0000                              | 0.0000                                      | 0.0000                                 | 507.7268                     | 507.7268                     |
| 3      | 0.0069                                    | 0.0000                              | 0.0008                                      | 0.0000                                 | 507.7268                     | 507.7268                     |
| 4      | 0.0553                                    | 0.0000                              | 0.0077                                      | 0.0000                                 | 507.7268                     | 507.7268                     |
| 5      | 0.2022                                    | 0.0002                              | 0.0335                                      | 0.0001                                 | 507.7270                     | 507.7267                     |
| 10     | 3.5728                                    | 0.0076                              | 0.9405                                      | 0.0017                                 | 507.7345                     | 507.7251                     |
| 15     | 11.7149                                   | 0.0436                              | 3.7496                                      | 0.0126                                 | 507.7704                     | 507.7142                     |
| 20     | 27.1864                                   | 0.1370                              | 9.0156                                      | 0.0433                                 | 507.8638                     | 507.6835                     |
| 25     | 52.9816                                   | 0.3330                              | 17.6535                                     | 0.1084                                 | 508.0598                     | 507.6184                     |
| 30     | 88.8004                                   | 0.6836                              | 30.3420                                     | 0.2266                                 | 508.4104                     | 507.5002                     |
| 35     | 132.4012                                  | 1.2340                              | 47.2211                                     | 0.4188                                 | 508.9608                     | 507.3080                     |
| 40     | 181.4085                                  | 2.0166                              | 68.0513                                     | 0.7055                                 | 509.7435                     | 507.0213                     |
| 45     | 233.9681                                  | 3.0539                              | 92.4252                                     | 1.1052                                 | 510.7807                     | 506.6216                     |
| 50     | 288.7758                                  | 4.3600                              | 119.8975                                    | 1.6349                                 | 512.0868                     | 506.0919                     |
| 55     | 344.9404                                  | 5.9438                              | 150.0467                                    | 2.3087                                 | 513.6706                     | 505.4181                     |
| 60     | 401.8491                                  | 7.8106                              | 182.4967                                    | 3.1391                                 | 515.5374                     | 504.5877                     |
| 65     | 459.0682                                  | 9.9628                              | 216.9204                                    | 4.1370                                 | 517.6896                     | 503.5898                     |
| 70     | 516.2767                                  | 12.4013                             | 253.0354                                    | 5.3112                                 | 520.1281                     | 502.4156                     |
| 75     | 573.2237                                  | 15.1250                             | 290.5988                                    | 6.6697                                 | 522.8519                     | 501.0571                     |
| 80     | 629.7027                                  | 18.1327                             | 329.3998                                    | 8.2192                                 | 525.8595                     | 499.5076                     |
| 85     | 685.5361                                  | 21.4210                             | 369.2543                                    | 9.9654                                 | 529.1478                     | 497.7614                     |
| 90     | 740.5673                                  | 24.9866                             | 410.0004                                    | 11.9131                                | 532.7134                     | 495.8137                     |
| 95     | 794.6573                                  | 28.8251                             | 451.4943                                    | 14.0666                                | 536.5519                     | 493.6602                     |
| 100    | 847.6836                                  | 32.9314                             | 493.6080                                    | 16.4291                                | 540.6582                     | 491.2977                     |
| 105    | 899.5379                                  | 37.3000                             | 536.2262                                    | 19.0036                                | 545.0268                     | 488.7233                     |
| 110    | 950.1300                                  | 41.9247                             | 579.2456                                    | 21.7921                                | 549.6515                     | 485.9348                     |
| 115    | 999.3844                                  | 46.7989                             | 622.5722                                    | 24.7964                                | 554.5258                     | 482.9304                     |
| 120    | 1047.2386                                 | 51.9161                             | 666.1218                                    | 28.0181                                | 559.6430                     | 479.7088                     |
| 125    | 1093.6493                                 | 57.2689                             | 709.8181                                    | 31.4578                                | 564.9957                     | 476.2690                     |
| 130    | 1138.5851                                 | 62.8500                             | 753.5919                                    | 35.1163                                | 570.5769                     | 472.6105                     |
| 135    | 1182.0251                                 | 68.6522                             | 797.3819                                    | 38.9938                                | 576.3790                     | 468.7331                     |
| 140    | 1223.9643                                 | 74.6678                             | 841.1318                                    | 43.0900                                | 582.3946                     | 464.6368                     |

|     |           |          |           |           |           |           |
|-----|-----------|----------|-----------|-----------|-----------|-----------|
| 145 | 1264.4045 | 80.8892  | 884.7921  | 47.4050   | 588.6161  | 460.3219  |
| 150 | 1303.3588 | 87.3092  | 928.3178  | 51.9378   | 595.0360  | 455.7891  |
| 155 | 1340.8456 | 93.9203  | 971.6705  | 56.6877   | 601.6472  | 451.0391  |
| 160 | 1376.8923 | 100.7151 | 1014.8136 | 61.6539   | 608.4420  | 446.0729  |
| 165 | 1411.5298 | 107.6868 | 1057.7165 | 66.8354   | 615.4136  | 440.8915  |
| 170 | 1444.7928 | 114.8281 | 1100.3517 | 72.2306   | 622.5550  | 435.4962  |
| 175 | 1476.7205 | 122.1325 | 1142.6966 | 77.8384   | 629.8593  | 429.8885  |
| 180 | 1507.3545 | 129.5931 | 1184.7298 | 83.6570   | 637.3199  | 424.0698  |
| 185 | 1536.7372 | 137.2038 | 1226.4329 | 89.6850   | 644.9306  | 418.0418  |
| 190 | 1564.9125 | 144.9584 | 1267.7918 | 95.9207   | 652.6852  | 411.8062  |
| 195 | 1591.9264 | 152.8508 | 1308.7932 | 102.3622  | 660.5776  | 405.3646  |
| 200 | 1617.8219 | 160.8757 | 1349.4262 | 109.0079  | 668.6026  | 398.7189  |
| 205 | 1642.6433 | 169.0272 | 1389.6817 | 115.8558  | 676.7540  | 391.8710  |
| 210 | 1666.4361 | 177.3002 | 1429.5523 | 122.9040  | 685.0271  | 384.8228  |
| 215 | 1689.2428 | 185.6898 | 1469.0346 | 130.1506  | 693.4167  | 377.5763  |
| 220 | 1711.1049 | 194.1910 | 1508.1211 | 137.5936  | 701.9178  | 370.1333  |
| 225 | 1732.0633 | 202.7993 | 1546.8110 | 145.2310  | 710.5261  | 362.4958  |
| 230 | 1752.1595 | 211.5101 | 1585.1010 | 153.0609  | 719.2369  | 354.6659  |
| 235 | 1771.4301 | 220.3193 | 1622.9911 | 161.0814  | 728.0461  | 346.6455  |
| 240 | 1789.9132 | 229.2229 | 1660.4812 | 169.2900  | 736.9498  | 338.4368  |
| 245 | 1807.6439 | 238.2171 | 1697.5714 | 177.6853  | 745.9439  | 330.0415  |
| 250 | 1824.6571 | 247.2981 | 1734.2634 | 186.2650  | 755.0250  | 321.4618  |
| 255 | 1840.9843 | 256.4624 | 1770.5587 | 195.0272  | 764.1892  | 312.6996  |
| 260 | 1856.6588 | 265.7068 | 1806.4599 | 203.9698  | 773.4337  | 303.7570  |
| 265 | 1871.7097 | 275.0280 | 1841.9695 | 213.0910  | 782.7548  | 294.6358  |
| 270 | 1886.1662 | 284.4228 | 1877.0909 | 222.3888  | 792.1496  | 285.3380  |
| 273 | 1894.9795 | 290.3780 | 1899.0204 | 228.3362  | 798.1049  | 279.3907  |
| 275 | 1900.0539 | 293.8886 | 1911.8289 | 231.8611  | 801.6154  | 275.8657  |
| 277 | 1905.8583 | 297.9797 | 1926.6487 | 235.9875  | 805.7066  | 271.7393  |
| 280 | 1913.4020 | 303.4223 | 1946.1853 | 241.5063  | 811.1491  | 266.2205  |
| 285 | 1926.2321 | 313.0216 | 1980.1659 | 251.3222  | 820.7484  | 256.4046  |
| 290 | 1938.5700 | 322.6836 | 2013.7740 | 261.3072  | 830.4105  | 246.4196  |
| 294 | 1947.1614 | 329.6781 | 2037.7439 | 268.6001  | 837.4050  | 239.1268  |
| 295 | 1950.4382 | 332.4064 | 2047.0146 | 271.4593  | 840.1332  | 236.2675  |
| 296 | 1952.7571 | 334.3579 | 2053.6188 | 273.5096  | 842.0847  | 234.2172  |
| 298 | 1957.6826 | 338.5617 | 2067.7701 | 277.9400  | 846.2886  | 229.7868  |
| 300 | 1961.8565 | 342.1873 | 2079.8926 | 281.7767  | 849.9141  | 225.9502  |
| 310 | 1983.4285 | 361.9150 | 2144.5770 | 302.9001  | 869.6418  | 204.8267  |
| 320 | 2003.4374 | 381.8504 | 2207.8688 | 324.6633  | 889.5772  | 183.0635  |
| 330 | 2022.0195 | 401.9786 | 2269.8061 | 347.0525  | 909.7055  | 160.6743  |
| 340 | 2039.2979 | 422.2861 | 2330.4280 | 370.0547  | 930.0129  | 137.6721  |
| 350 | 2055.3856 | 442.7605 | 2389.7778 | 393.6566  | 950.4873  | 114.0702  |
| 360 | 2070.3825 | 463.3901 | 2447.8921 | 417.8458  | 971.1169  | 89.8810   |
| 370 | 2084.3783 | 484.1643 | 2504.8116 | 442.6102  | 991.8912  | 65.1167   |
| 373 | 2088.5938 | 490.7369 | 2522.4999 | 450.5282  | 998.4638  | 57.1987   |
| 380 | 2097.4579 | 505.0746 | 2560.5737 | 467.9379  | 1012.8015 | 39.7889   |
| 390 | 2109.6952 | 526.1104 | 2615.2158 | 493.8176  | 1033.8372 | 13.9093   |
| 400 | 2121.1567 | 547.2657 | 2668.7754 | 520.2383  | 1054.9926 | -12.5115  |
| 425 | 2146.8087 | 600.6231 | 2798.1592 | 588.5876  | 1108.3499 | -80.8608  |
| 450 | 2168.8005 | 654.5748 | 2921.5058 | 660.0951  | 1162.3016 | -152.3683 |
| 475 | 2187.7751 | 709.0378 | 3039.2875 | 734.6157  | 1216.7647 | -226.8889 |
| 500 | 2204.2461 | 763.9418 | 3151.9350 | 812.0156  | 1271.6687 | -304.2888 |
| 525 | 2218.6244 | 819.2318 | 3259.8358 | 892.1719  | 1326.9586 | -384.4450 |
| 550 | 2231.2434 | 874.8575 | 3363.3440 | 974.9699  | 1382.5843 | -467.2430 |
| 575 | 2242.3723 | 930.7804 | 3462.7764 | 1060.3040 | 1438.5072 | -552.5772 |

|      |           |           |           |            |           |             |
|------|-----------|-----------|-----------|------------|-----------|-------------|
| 600  | 2252.2333 | 986.9647  | 3558.4241 | 1148.0761  | 1494.6916 | -640.3493   |
| 650  | 2268.8499 | 1100.0069 | 3739.3794 | 1330.5749  | 1607.7338 | -822.8480   |
| 700  | 2282.2130 | 1213.7949 | 3908.0268 | 1521.8067  | 1721.5218 | -1014.0799  |
| 750  | 2293.1116 | 1328.1860 | 4065.8670 | 1721.1946  | 1835.9128 | -1213.4678  |
| 800  | 2302.1113 | 1443.0730 | 4214.1572 | 1928.2318  | 1950.7998 | -1420.5050  |
| 850  | 2309.6234 | 1558.3720 | 4353.9532 | 2142.4668  | 2066.0988 | -1634.7400  |
| 900  | 2315.9583 | 1674.0144 | 4486.1523 | 2363.4973  | 2181.7413 | -1855.7705  |
| 950  | 2321.3461 | 1789.9502 | 4611.5177 | 2590.9653  | 2297.6770 | -2083.2384  |
| 1000 | 2325.9664 | 1906.1349 | 4730.7079 | 2824.5437  | 2413.8618 | -2316.8168  |
| 1050 | 2329.9582 | 2022.5348 | 4844.2916 | 3063.9401  | 2530.2616 | -2556.2133  |
| 1100 | 2333.4295 | 2139.1209 | 4952.7627 | 3308.8845  | 2646.8477 | -2801.1577  |
| 1150 | 2336.4660 | 2255.8691 | 5056.5561 | 3559.1355  | 2763.5959 | -3051.4087  |
| 1200 | 2339.1383 | 2372.7601 | 5156.0534 | 3814.4656  | 2880.4869 | -3306.7388  |
| 1250 | 2341.5004 | 2489.7765 | 5251.5904 | 4074.6710  | 2997.5033 | -3566.9442  |
| 1300 | 2343.6007 | 2606.9039 | 5343.4666 | 4339.5608  | 3114.6307 | -3831.8340  |
| 1350 | 2345.4748 | 2724.1316 | 5431.9513 | 4608.9575  | 3231.8584 | -4101.2306  |
| 1400 | 2347.1535 | 2841.4471 | 5517.2823 | 4882.6998  | 3349.1740 | -4374.9730  |
| 1450 | 2348.6642 | 2958.8427 | 5599.6733 | 5160.6334  | 3466.5696 | -4652.9066  |
| 1500 | 2350.0278 | 3076.3097 | 5679.3205 | 5442.6176  | 3584.0366 | -4934.8907  |
| 1550 | 2351.2633 | 3193.8424 | 5756.3977 | 5728.5199  | 3701.5692 | -5220.7931  |
| 1600 | 2352.3858 | 3311.4319 | 5831.0637 | 6018.2132  | 3819.1587 | -5510.4864  |
| 1650 | 2353.4093 | 3429.0774 | 5903.4673 | 6311.5845  | 3936.8042 | -5803.8577  |
| 1700 | 2354.3439 | 3546.7711 | 5973.7382 | 6608.5210  | 4054.4980 | -6100.7941  |
| 1750 | 2355.2003 | 3664.5093 | 6041.9979 | 6908.9212  | 4172.2361 | -6401.1944  |
| 1800 | 2355.9868 | 3782.2879 | 6108.3560 | 7212.6859  | 4290.0148 | -6704.9591  |
| 1850 | 2356.7110 | 3900.1052 | 6172.9174 | 7519.7224  | 4407.8320 | -7011.9956  |
| 1900 | 2357.3787 | 4017.9572 | 6235.7767 | 7829.9449  | 4525.6840 | -7322.2181  |
| 1950 | 2357.9973 | 4135.8410 | 6297.0189 | 8143.2694  | 4643.5678 | -7635.5425  |
| 2000 | 2358.5693 | 4253.7547 | 6356.7254 | 8459.6177  | 4761.4815 | -7951.8908  |
| 2050 | 2359.1006 | 4371.6955 | 6414.9711 | 8778.9136  | 4879.4223 | -8271.1868  |
| 2100 | 2359.5945 | 4489.6632 | 6471.8257 | 9101.0877  | 4997.3900 | -8593.3609  |
| 2150 | 2360.0551 | 4607.6532 | 6527.3525 | 9426.0695  | 5115.3800 | -8918.3427  |
| 2200 | 2360.4841 | 4725.6663 | 6581.6139 | 9753.7964  | 5233.3931 | -9246.0695  |
| 2250 | 2360.8849 | 4843.6997 | 6634.6663 | 10084.2084 | 5351.4265 | -9576.4815  |
| 2300 | 2361.2607 | 4961.7533 | 6686.5605 | 10417.2409 | 5469.4801 | -9909.5141  |
| 2350 | 2361.6124 | 5079.8233 | 6737.3463 | 10752.8361 | 5587.5502 | -10245.1093 |
| 2400 | 2361.9425 | 5197.9127 | 6787.0688 | 11090.9496 | 5705.6395 | -10583.2228 |
| 2450 | 2362.2518 | 5316.0165 | 6835.7744 | 11431.5235 | 5823.7433 | -10923.7966 |
| 2500 | 2362.5436 | 5434.1357 | 6883.5013 | 11774.5094 | 5941.8626 | -11266.7826 |
| 2550 | 2362.8188 | 5552.2685 | 6930.2879 | 12119.8593 | 6059.9953 | -11612.1325 |
| 2600 | 2363.0783 | 5670.4157 | 6976.1716 | 12467.5152 | 6178.1425 | -11959.7883 |
| 2650 | 2363.3235 | 5788.5764 | 7021.1855 | 12817.4577 | 6296.3033 | -12309.7309 |
| 2700 | 2363.5547 | 5906.7459 | 7065.3638 | 13169.6195 | 6414.4727 | -12661.8926 |
| 2750 | 2363.7742 | 6024.9288 | 7108.7365 | 13523.9714 | 6532.6556 | -13016.2446 |
| 2800 | 2363.9812 | 6143.1223 | 7151.3300 | 13880.4750 | 6650.8492 | -13372.7482 |
| 2850 | 2364.1774 | 6261.3255 | 7193.1737 | 14239.0916 | 6769.0523 | -13731.3648 |
| 2900 | 2364.3637 | 6379.5403 | 7234.2914 | 14599.7730 | 6887.2671 | -14092.0462 |
| 2950 | 2364.5408 | 6497.7599 | 7274.7108 | 14962.4999 | 7005.4867 | -14454.7730 |
| 3000 | 2364.7087 | 6615.9910 | 7314.4533 | 15327.2336 | 7123.7179 | -14819.5068 |

Thermodynamic Properties for empirical formula  $\text{Ce}_{31}\text{MnO}_{64}$  unit

Zero-point energy = 513.84 kJ/mol

| T   | Cv                                  | E(T) - E(0)          | S(T)                                | -(A(T) - E(0))       | E(T)                 | A(T)                 |
|-----|-------------------------------------|----------------------|-------------------------------------|----------------------|----------------------|----------------------|
| K   | J K <sup>-1</sup> mol <sup>-1</sup> | kJ mol <sup>-1</sup> | J K <sup>-1</sup> mol <sup>-1</sup> | kJ mol <sup>-1</sup> | kJ mol <sup>-1</sup> | kJ mol <sup>-1</sup> |
| 0   | 0.0000                              | 0.0000               | 0.0000                              | 0.0000               | 513.8438             | 513.8438             |
| 1   | 0.0000                              | 0.0000               | 0.0000                              | 0.0000               | 513.8438             | 513.8438             |
| 2   | 0.0001                              | 0.0000               | 0.0000                              | 0.0000               | 513.8438             | 513.8438             |
| 3   | 0.0086                              | 0.0000               | 0.0009                              | 0.0000               | 513.8438             | 513.8438             |
| 4   | 0.0776                              | 0.0000               | 0.0103                              | 0.0000               | 513.8438             | 513.8438             |
| 5   | 0.2916                              | 0.0002               | 0.0473                              | 0.0001               | 513.8440             | 513.8437             |
| 10  | 4.1789                              | 0.0096               | 1.1955                              | 0.0024               | 513.8534             | 513.8414             |
| 15  | 12.0581                             | 0.0482               | 4.2256                              | 0.0151               | 513.8920             | 513.8287             |
| 20  | 26.8766                             | 0.1417               | 9.5030                              | 0.0483               | 513.9855             | 513.7955             |
| 25  | 52.0937                             | 0.3345               | 18.0061                             | 0.1156               | 514.1783             | 513.7282             |
| 30  | 87.5630                             | 0.6798               | 30.4980                             | 0.2351               | 514.5236             | 513.6087             |
| 35  | 131.0479                            | 1.2235               | 47.1749                             | 0.4275               | 515.0673             | 513.4163             |
| 40  | 180.1291                            | 1.9996               | 67.8274                             | 0.7135               | 515.8434             | 513.1303             |
| 45  | 232.9044                            | 3.0310               | 92.0619                             | 1.1118               | 516.8748             | 512.7320             |
| 50  | 288.0317                            | 4.3325               | 119.4378                            | 1.6394               | 518.1763             | 512.2044             |
| 55  | 344.5954                            | 5.9136               | 149.5343                            | 2.3107               | 519.7574             | 511.5331             |
| 60  | 401.9676                            | 7.7798               | 181.9737                            | 3.1386               | 521.6236             | 510.7052             |
| 65  | 459.7050                            | 9.9338               | 216.4270                            | 4.1338               | 523.7776             | 509.7100             |
| 70  | 517.4797                            | 12.3768              | 252.6098                            | 5.3057               | 526.2207             | 508.5381             |
| 75  | 575.0341                            | 15.1082              | 290.2767                            | 6.6623               | 528.9521             | 507.1815             |
| 80  | 632.1543                            | 18.1264              | 329.2148                            | 8.2106               | 531.9702             | 505.6332             |
| 85  | 688.6553                            | 21.4287              | 369.2378                            | 9.9563               | 535.2725             | 503.8875             |
| 90  | 744.3731                            | 25.0117              | 410.1816                            | 11.9045              | 538.8555             | 501.9394             |
| 95  | 799.1610                            | 28.8709              | 451.9000                            | 14.0594              | 542.7147             | 499.7844             |
| 100 | 852.8893                            | 33.0014              | 494.2626                            | 16.4245              | 546.8453             | 497.4193             |
| 105 | 905.4445                            | 37.3978              | 537.1518                            | 19.0029              | 551.2416             | 494.8409             |
| 110 | 956.7293                            | 42.0537              | 580.4619                            | 21.7967              | 555.8975             | 492.0471             |
| 115 | 1006.6646                           | 46.9628              | 624.0969                            | 24.8079              | 560.8066             | 489.0359             |
| 120 | 1055.1856                           | 52.1180              | 667.9705                            | 28.0381              | 565.9618             | 485.8058             |
| 125 | 1102.2440                           | 57.5121              | 712.0043                            | 31.4879              | 571.3559             | 482.3559             |
| 130 | 1147.8067                           | 63.1379              | 756.1277                            | 35.1582              | 576.9817             | 478.6856             |
| 135 | 1191.8537                           | 68.9876              | 800.2770                            | 39.0491              | 582.8314             | 474.7947             |
| 140 | 1234.3766                           | 75.0538              | 844.3952                            | 43.1609              | 588.8976             | 470.6829             |
| 145 | 1275.3780                           | 81.3287              | 888.4305                            | 47.4929              | 595.1725             | 466.3509             |
| 150 | 1314.8694                           | 87.8049              | 932.3378                            | 52.0449              | 601.6487             | 461.7990             |
| 155 | 1352.8717                           | 94.4748              | 976.0755                            | 56.8160              | 608.3187             | 457.0279             |
| 160 | 1389.4107                           | 101.3312             | 1019.6086                           | 61.8052              | 615.1750             | 452.0386             |
| 165 | 1424.5179                           | 108.3665             | 1062.9039                           | 67.0116              | 622.2103             | 446.8323             |
| 170 | 1458.2307                           | 115.5740             | 1105.9340                           | 72.4337              | 629.4178             | 441.4101             |
| 175 | 1490.5866                           | 122.9465             | 1148.6748                           | 78.0704              | 636.7903             | 435.7734             |
| 180 | 1521.6297                           | 130.4775             | 1191.1037                           | 83.9199              | 644.3213             | 429.9239             |
| 185 | 1551.4023                           | 138.1606             | 1233.2043                           | 89.9808              | 652.0044             | 423.8631             |
| 190 | 1579.9502                           | 145.9894             | 1274.9589                           | 96.2513              | 659.8332             | 417.5925             |
| 195 | 1607.3182                           | 153.9580             | 1316.3552                           | 102.7296             | 667.8018             | 411.1142             |
| 200 | 1633.5513                           | 162.0606             | 1357.3823                           | 109.4141             | 675.9044             | 404.4297             |
| 205 | 1658.6961                           | 170.2917             | 1398.0303                           | 116.3028             | 684.1355             | 397.5410             |
| 210 | 1682.7965                           | 178.6457             | 1438.2917                           | 123.3937             | 692.4895             | 390.4501             |
| 215 | 1705.8967                           | 187.1178             | 1478.1614                           | 130.6850             | 700.9616             | 383.1588             |
| 220 | 1728.0383                           | 195.7030             | 1517.6346                           | 138.1746             | 709.5468             | 375.6692             |
| 225 | 1749.2652                           | 204.3966             | 1556.7078                           | 145.8605             | 718.2404             | 367.9833             |
| 230 | 1769.6167                           | 213.1940             | 1595.3794                           | 153.7409             | 727.0378             | 360.1030             |
| 235 | 1789.1308                           | 222.0912             | 1633.6478                           | 161.8136             | 735.9350             | 352.0302             |

|      |           |           |           |           |           |            |
|------|-----------|-----------|-----------|-----------|-----------|------------|
| 240  | 1807.8476 | 231.0840  | 1671.5121 | 170.0766  | 744.9278  | 343.7672   |
| 245  | 1825.8011 | 240.1683  | 1708.9748 | 178.5279  | 754.0121  | 335.3159   |
| 250  | 1843.0272 | 249.3406  | 1746.0350 | 187.1656  | 763.1844  | 326.6782   |
| 255  | 1859.5589 | 258.5973  | 1782.6962 | 195.9875  | 772.4411  | 317.8563   |
| 260  | 1875.4288 | 267.9350  | 1818.9600 | 204.9917  | 781.7788  | 308.8521   |
| 265  | 1890.6668 | 277.3505  | 1854.8296 | 214.1764  | 791.1943  | 299.6675   |
| 270  | 1905.3020 | 286.8406  | 1890.3076 | 223.5393  | 800.6844  | 290.3045   |
| 273  | 1914.2252 | 292.8564  | 1912.4591 | 229.5286  | 806.7002  | 284.3152   |
| 275  | 1919.3627 | 296.4024  | 1925.3974 | 233.0786  | 810.2462  | 280.7652   |
| 277  | 1925.2386 | 300.5353  | 1940.3676 | 237.2343  | 814.3791  | 276.6095   |
| 280  | 1932.8746 | 306.0332  | 1960.1038 | 242.7924  | 819.8770  | 271.0514   |
| 285  | 1945.8635 | 315.7301  | 1994.4303 | 252.6789  | 829.5739  | 261.1649   |
| 290  | 1958.3528 | 325.4909  | 2028.3809 | 262.7361  | 839.3347  | 251.1077   |
| 294  | 1967.0489 | 332.5566  | 2052.5953 | 270.0818  | 846.4004  | 243.7620   |
| 295  | 1970.3664 | 335.3128  | 2061.9607 | 272.9620  | 849.1566  | 240.8818   |
| 296  | 1972.7136 | 337.2843  | 2068.6331 | 275.0272  | 851.1281  | 238.8166   |
| 298  | 1977.6998 | 341.5310  | 2082.9283 | 279.4902  | 855.3748  | 234.3537   |
| 300  | 1981.9252 | 345.1937  | 2095.1747 | 283.3549  | 859.0375  | 230.4889   |
| 310  | 2003.7608 | 365.1234  | 2160.5218 | 304.6344  | 878.9672  | 209.2094   |
| 320  | 2024.0125 | 385.2633  | 2224.4629 | 326.5604  | 899.1071  | 187.2834   |
| 330  | 2042.8207 | 405.5986  | 2287.0362 | 349.1189  | 919.4424  | 164.7249   |
| 340  | 2060.3086 | 426.1151  | 2348.2834 | 372.2964  | 939.9589  | 141.5474   |
| 350  | 2076.5901 | 446.8004  | 2408.2444 | 396.0799  | 960.6442  | 117.7639   |
| 360  | 2091.7674 | 467.6434  | 2466.9589 | 420.4568  | 981.4872  | 93.3870    |
| 370  | 2105.9329 | 488.6318  | 2524.4663 | 445.4148  | 1002.4756 | 68.4290    |
| 373  | 2110.1990 | 495.2729  | 2542.3375 | 453.3950  | 1009.1167 | 60.4488    |
| 380  | 2119.1696 | 509.7582  | 2580.8062 | 470.9419  | 1023.6020 | 42.9019    |
| 390  | 2131.5532 | 531.0120  | 2636.0146 | 497.0268  | 1044.8558 | 16.8170    |
| 400  | 2143.1528 | 552.3864  | 2690.1279 | 523.6582  | 1066.2302 | -9.8144    |
| 425  | 2169.1115 | 606.2976  | 2820.8553 | 592.5583  | 1120.1414 | -78.7145   |
| 450  | 2191.3653 | 660.8108  | 2945.4849 | 664.6493  | 1174.6546 | -150.8055  |
| 475  | 2210.5660 | 715.8402  | 3064.4922 | 739.7848  | 1229.6840 | -225.9410  |
| 500  | 2227.2324 | 771.3174  | 3178.3137 | 817.8297  | 1285.1612 | -303.9859  |
| 525  | 2241.7820 | 827.1833  | 3287.3402 | 898.6595  | 1341.0271 | -384.8157  |
| 550  | 2254.5506 | 883.3908  | 3391.9293 | 982.1588  | 1397.2346 | -468.3150  |
| 575  | 2265.8118 | 939.8975  | 3492.4010 | 1068.2206 | 1453.7413 | -554.3768  |
| 600  | 2275.7892 | 996.6704  | 3589.0489 | 1156.7459 | 1510.5142 | -642.9021  |
| 650  | 2292.6020 | 1110.8945 | 3771.8983 | 1340.8237 | 1624.7383 | -826.9799  |
| 700  | 2306.1230 | 1225.8741 | 3942.3101 | 1533.7263 | 1739.7179 | -1019.8825 |
| 750  | 2317.1506 | 1341.4645 | 4101.8048 | 1734.8702 | 1855.3083 | -1221.0264 |
| 800  | 2326.2558 | 1457.5556 | 4251.6506 | 1943.7436 | 1971.3994 | -1429.8997 |
| 850  | 2333.8569 | 1574.0636 | 4392.9134 | 2159.8899 | 2087.9074 | -1646.0461 |
| 900  | 2340.2657 | 1690.9208 | 4526.4993 | 2382.9042 | 2204.7646 | -1869.0604 |
| 950  | 2345.7176 | 1808.0732 | 4653.1809 | 2612.4215 | 2321.9171 | -2098.5777 |
| 1000 | 2350.3928 | 1925.4775 | 4773.6224 | 2848.1148 | 2439.3213 | -2334.2710 |
| 1050 | 2354.4312 | 2043.0999 | 4888.3984 | 3089.6870 | 2556.9437 | -2575.8432 |
| 1100 | 2357.9432 | 2160.9104 | 4998.0095 | 3336.8660 | 2674.7542 | -2823.0222 |
| 1150 | 2361.0154 | 2278.8859 | 5102.8937 | 3589.4057 | 2792.7297 | -3075.5619 |
| 1200 | 2363.7193 | 2397.0051 | 5203.4361 | 3847.0794 | 2910.8489 | -3333.2355 |
| 1250 | 2366.1097 | 2515.2507 | 5299.9767 | 4109.6796 | 3029.0946 | -3595.8358 |
| 1300 | 2368.2341 | 2633.6102 | 5392.8199 | 4377.0124 | 3147.4540 | -3863.1686 |
| 1350 | 2370.1298 | 2752.0691 | 5482.2342 | 4648.9012 | 3265.9129 | -4135.0574 |
| 1400 | 2371.8285 | 2870.6177 | 5568.4615 | 4925.1792 | 3384.4615 | -4411.3354 |
| 1450 | 2373.3575 | 2989.2474 | 5651.7188 | 5205.6938 | 3503.0912 | -4691.8500 |
| 1500 | 2374.7369 | 3107.9504 | 5732.2033 | 5490.3014 | 3621.7942 | -4976.4576 |

|      |           |           |           |            |           |             |
|------|-----------|-----------|-----------|------------|-----------|-------------|
| 1550 | 2375.9865 | 3226.7180 | 5810.0912 | 5778.8677  | 3740.5618 | -5265.0239  |
| 1600 | 2377.1223 | 3345.5454 | 5885.5437 | 6071.2664  | 3859.3892 | -5557.4226  |
| 1650 | 2378.1575 | 3464.4269 | 5958.7081 | 6367.3799  | 3978.2707 | -5853.5360  |
| 1700 | 2379.1037 | 3583.3586 | 6029.7173 | 6667.0970  | 4097.2024 | -6153.2532  |
| 1750 | 2379.9700 | 3702.3346 | 6098.6945 | 6970.3137  | 4216.1784 | -6456.4699  |
| 1800 | 2380.7657 | 3821.3531 | 6165.7511 | 7276.9305  | 4335.1969 | -6763.0867  |
| 1850 | 2381.4991 | 3940.4092 | 6230.9917 | 7586.8548  | 4454.2530 | -7073.0110  |
| 1900 | 2382.1750 | 4059.5001 | 6294.5113 | 7899.9979  | 4573.3439 | -7386.1541  |
| 1950 | 2382.8003 | 4178.6237 | 6356.3979 | 8216.2748  | 4692.4675 | -7702.4310  |
| 2000 | 2383.3790 | 4297.7783 | 6416.7321 | 8535.6074  | 4811.6221 | -8021.7636  |
| 2050 | 2383.9161 | 4416.9598 | 6475.5914 | 8857.9195  | 4930.8036 | -8344.0756  |
| 2100 | 2384.4166 | 4536.1674 | 6533.0438 | 9183.1386  | 5050.0112 | -8669.2948  |
| 2150 | 2384.8814 | 4655.3991 | 6589.1560 | 9511.1974  | 5169.2429 | -8997.3536  |
| 2200 | 2385.3163 | 4774.6540 | 6643.9877 | 9842.0291  | 5288.4978 | -9328.1853  |
| 2250 | 2385.7220 | 4893.9291 | 6697.5972 | 10175.5740 | 5407.7729 | -9661.7302  |
| 2300 | 2386.1020 | 5013.2245 | 6750.0368 | 10511.7674 | 5527.0684 | -9997.9236  |
| 2350 | 2386.4578 | 5132.5373 | 6801.3573 | 10850.5563 | 5646.3811 | -10336.7125 |
| 2400 | 2386.7912 | 5251.8684 | 6851.6035 | 11191.8827 | 5765.7122 | -10678.0389 |
| 2450 | 2387.1055 | 5371.2150 | 6900.8205 | 11535.6888 | 5885.0588 | -11021.8450 |
| 2500 | 2387.4007 | 5490.5769 | 6949.0496 | 11881.9360 | 6004.4207 | -11368.0922 |
| 2550 | 2387.6784 | 5609.9534 | 6996.3293 | 12230.5760 | 6123.7972 | -11716.7322 |
| 2600 | 2387.9411 | 5729.3433 | 7042.6960 | 12581.5510 | 6243.1871 | -12067.7072 |
| 2650 | 2388.1889 | 5848.7458 | 7088.1847 | 12934.8223 | 6362.5896 | -12420.9785 |
| 2700 | 2388.4226 | 5968.1599 | 7132.8269 | 13290.3514 | 6482.0037 | -12776.5075 |
| 2750 | 2388.6446 | 6087.5865 | 7176.6544 | 13648.0899 | 6601.4303 | -13134.2461 |
| 2800 | 2388.8541 | 6207.0228 | 7219.6961 | 14007.9994 | 6720.8666 | -13494.1556 |
| 2850 | 2389.0528 | 6326.4707 | 7261.9796 | 14370.0413 | 6840.3145 | -13856.1975 |
| 2900 | 2389.2415 | 6445.9272 | 7303.5313 | 14734.1865 | 6959.7710 | -14220.3427 |
| 2950 | 2389.4203 | 6565.3924 | 7344.3756 | 15100.3772 | 7079.2362 | -14586.5334 |
| 3000 | 2389.5907 | 6684.8673 | 7384.5363 | 15468.6037 | 7198.7111 | -14954.7599 |

Thermodynamic Properties for empirical formula  $\text{Ce}_{31}\text{MnO}_{63}$  unit

Zero-point energy = 502.71 kJ/mol

| T  | Cv                                  | E(T) - E(0)          | S(T)                                | -(A(T) - E(0))       | E(T)                 | A(T)                 |
|----|-------------------------------------|----------------------|-------------------------------------|----------------------|----------------------|----------------------|
| K  | J K <sup>-1</sup> mol <sup>-1</sup> | kJ mol <sup>-1</sup> | J K <sup>-1</sup> mol <sup>-1</sup> | kJ mol <sup>-1</sup> | kJ mol <sup>-1</sup> | kJ mol <sup>-1</sup> |
| 0  | 0.0000                              | 0.0000               | 0.0000                              | 0.0000               | 502.7091             | 502.7091             |
| 1  | 0.0000                              | 0.0000               | 0.0000                              | 0.0000               | 502.7091             | 502.7091             |
| 2  | 0.0001                              | 0.0000               | 0.0000                              | 0.0000               | 502.7091             | 502.7091             |
| 3  | 0.0058                              | 0.0000               | 0.0006                              | 0.0000               | 502.7091             | 502.7091             |
| 4  | 0.0436                              | 0.0000               | 0.0063                              | 0.0001               | 502.7091             | 502.7090             |
| 5  | 0.1538                              | 0.0001               | 0.0261                              | 0.0001               | 502.7092             | 502.7090             |
| 10 | 2.9731                              | 0.0060               | 0.7448                              | 0.0014               | 502.7151             | 502.7077             |
| 15 | 11.3018                             | 0.0389               | 3.2960                              | 0.0106               | 502.7480             | 502.6985             |
| 20 | 28.5174                             | 0.1339               | 8.6481                              | 0.0391               | 502.8430             | 502.6700             |
| 25 | 57.0446                             | 0.3431               | 17.8662                             | 0.1035               | 503.0522             | 502.6056             |
| 30 | 95.8189                             | 0.7215               | 31.5574                             | 0.2252               | 503.4306             | 502.4839             |
| 35 | 142.1647                            | 1.3139               | 49.7288                             | 0.4267               | 504.0230             | 502.2825             |
| 40 | 193.5422                            | 2.1515               | 72.0220                             | 0.7293               | 504.8606             | 501.9798             |
| 45 | 248.0656                            | 3.2545               | 97.9424                             | 1.1529               | 505.9637             | 501.5562             |
| 50 | 304.4522                            | 4.6352               | 126.9849                            | 1.7140               | 507.3443             | 500.9951             |

|     |           |          |           |          |          |          |
|-----|-----------|----------|-----------|----------|----------|----------|
| 55  | 361.8506  | 6.3007   | 158.6887  | 2.4271   | 509.0098 | 500.2820 |
| 60  | 419.6927  | 8.2545   | 192.6521  | 3.3047   | 510.9636 | 499.4044 |
| 65  | 477.5871  | 10.4977  | 228.5323  | 4.3568   | 513.2068 | 498.3523 |
| 70  | 535.2516  | 13.0300  | 266.0376  | 5.5926   | 515.7391 | 497.1165 |
| 75  | 592.4694  | 15.8494  | 304.9204  | 7.0195   | 518.5586 | 495.6896 |
| 80  | 649.0635  | 18.9536  | 344.9679  | 8.6437   | 521.6627 | 494.0654 |
| 85  | 704.8814  | 22.3388  | 385.9962  | 10.4708  | 525.0479 | 492.2383 |
| 90  | 759.7890  | 26.0009  | 427.8451  | 12.5050  | 528.7100 | 490.2041 |
| 95  | 813.6661  | 29.9349  | 470.3731  | 14.7503  | 532.6440 | 487.9588 |
| 100 | 866.4062  | 34.1356  | 513.4548  | 17.2096  | 536.8447 | 485.4995 |
| 105 | 917.9163  | 38.5968  | 556.9783  | 19.8855  | 541.3059 | 482.8236 |
| 110 | 968.1177  | 43.3124  | 600.8437  | 22.7800  | 546.0216 | 479.9291 |
| 115 | 1016.9446 | 48.2757  | 644.9606  | 25.8943  | 550.9849 | 476.8148 |
| 120 | 1064.3465 | 53.4795  | 689.2481  | 29.2298  | 556.1886 | 473.4793 |
| 125 | 1110.2842 | 58.9166  | 733.6330  | 32.7870  | 561.6257 | 469.9221 |
| 130 | 1154.7352 | 64.5797  | 778.0501  | 36.5662  | 567.2889 | 466.1429 |
| 135 | 1197.6847 | 70.4615  | 822.4403  | 40.5673  | 573.1706 | 462.1418 |
| 140 | 1239.1300 | 76.5541  | 866.7505  | 44.7903  | 579.2633 | 457.9188 |
| 145 | 1279.0796 | 82.8501  | 910.9346  | 49.2346  | 585.5592 | 453.4745 |
| 150 | 1317.5475 | 89.3423  | 954.9500  | 53.8993  | 592.0514 | 448.8098 |
| 155 | 1354.5562 | 96.0231  | 998.7600  | 58.7838  | 598.7323 | 443.9253 |
| 160 | 1390.1340 | 102.8854 | 1042.3305 | 63.8865  | 605.5945 | 438.8226 |
| 165 | 1424.3133 | 109.9220 | 1085.6341 | 69.2065  | 612.6312 | 433.5026 |
| 170 | 1457.1315 | 117.1262 | 1128.6451 | 74.7423  | 619.8353 | 427.9668 |
| 175 | 1488.6277 | 124.4911 | 1171.3410 | 80.4924  | 627.2002 | 422.2167 |
| 180 | 1518.8435 | 132.0102 | 1213.7034 | 86.4551  | 634.7193 | 416.2540 |
| 185 | 1547.8221 | 139.6772 | 1255.7158 | 92.6287  | 642.3864 | 410.0804 |
| 190 | 1575.6083 | 147.4865 | 1297.3649 | 99.0115  | 650.1956 | 403.6976 |
| 195 | 1602.2464 | 155.4315 | 1338.6389 | 105.6017 | 658.1406 | 397.1074 |
| 200 | 1627.7811 | 163.5070 | 1379.5289 | 112.3972 | 666.2161 | 390.3119 |
| 205 | 1652.2565 | 171.7074 | 1420.0264 | 119.3962 | 674.4165 | 383.3129 |
| 210 | 1675.7159 | 180.0277 | 1460.1248 | 126.5967 | 682.7368 | 376.1124 |
| 215 | 1698.2025 | 188.4628 | 1499.8207 | 133.9967 | 691.1719 | 368.7124 |
| 220 | 1719.7579 | 197.0081 | 1539.1101 | 141.5941 | 699.7173 | 361.1150 |
| 225 | 1740.4227 | 205.6587 | 1577.9913 | 149.3870 | 708.3678 | 353.3222 |
| 230 | 1760.2371 | 214.4109 | 1616.4617 | 157.3732 | 717.1200 | 345.3359 |
| 235 | 1779.2382 | 223.2597 | 1654.5230 | 165.5508 | 725.9688 | 337.1583 |
| 240 | 1797.4620 | 232.2017 | 1692.1745 | 173.9177 | 734.9109 | 328.7914 |
| 245 | 1814.9449 | 241.2331 | 1729.4185 | 182.4718 | 743.9422 | 320.2373 |
| 250 | 1831.7202 | 250.3499 | 1766.2543 | 191.2111 | 753.0590 | 311.4980 |
| 255 | 1847.8213 | 259.5490 | 1802.6876 | 200.1336 | 762.2581 | 302.5755 |
| 260 | 1863.2780 | 268.8271 | 1838.7194 | 209.2372 | 771.5362 | 293.4719 |
| 265 | 1878.1194 | 278.1807 | 1874.3529 | 218.5200 | 780.8898 | 284.1891 |
| 270 | 1892.3754 | 287.6071 | 1909.5931 | 227.9799 | 790.3162 | 274.7292 |
| 275 | 1901.0683 | 293.5818 | 1931.5933 | 234.0298 | 796.2909 | 268.6793 |
| 275 | 1906.0728 | 297.1032 | 1944.4426 | 237.6151 | 799.8123 | 265.0940 |
| 277 | 1911.7965 | 301.2076 | 1959.3089 | 241.8117 | 803.9167 | 260.8974 |
| 280 | 1919.2363 | 306.6668 | 1978.9062 | 247.4236 | 809.3759 | 255.2855 |
| 285 | 1931.8902 | 316.2948 | 2012.9882 | 257.4034 | 819.0039 | 245.3057 |
| 290 | 1944.0593 | 325.9849 | 2046.6928 | 267.5528 | 828.6940 | 235.1563 |
| 294 | 1952.5326 | 332.9987 | 2070.7309 | 274.9641 | 835.7078 | 227.7450 |
| 295 | 1955.7645 | 335.7343 | 2080.0265 | 277.8696 | 838.4434 | 224.8395 |
| 296 | 1958.0518 | 337.6914 | 2086.6490 | 279.9529 | 840.4006 | 222.7562 |
| 298 | 1962.9108 | 341.9063 | 2100.8377 | 284.4545 | 844.6154 | 218.2546 |
| 300 | 1967.0281 | 345.5416 | 2112.9919 | 288.3523 | 848.2507 | 214.3568 |

|      |           |           |           |            |           |             |
|------|-----------|-----------|-----------|------------|-----------|-------------|
| 310  | 1988.3066 | 365.3192  | 2177.8417 | 309.8075   | 868.0284  | 192.9016    |
| 320  | 2008.0453 | 385.3024  | 2241.2840 | 331.9042   | 888.0115  | 170.8050    |
| 330  | 2026.3771 | 405.4754  | 2303.3584 | 354.6283   | 908.1845  | 148.0808    |
| 340  | 2043.4244 | 425.8254  | 2364.1084 | 377.9666   | 928.5345  | 124.7425    |
| 350  | 2059.2976 | 446.3398  | 2423.5738 | 401.9059   | 949.0489  | 100.8032    |
| 360  | 2074.0958 | 467.0078  | 2481.7962 | 426.4337   | 969.7169  | 76.2754     |
| 370  | 2087.9078 | 487.8178  | 2538.8146 | 451.5375   | 990.5269  | 51.1716     |
| 373  | 2092.0676 | 494.4019  | 2556.5320 | 459.5627   | 997.1110  | 43.1464     |
| 380  | 2100.8153 | 508.7628  | 2594.6690 | 477.2057   | 1011.4719 | 25.5034     |
| 390  | 2112.8921 | 529.8313  | 2649.3960 | 503.4268   | 1032.5404 | -0.7177     |
| 400  | 2124.2048 | 551.0176  | 2703.0345 | 530.1897   | 1053.7267 | -27.4806    |
| 425  | 2149.5258 | 604.4473  | 2832.5929 | 599.3977   | 1107.1564 | -96.6886    |
| 450  | 2171.2359 | 658.4626  | 2956.0867 | 671.7679   | 1161.1718 | -169.0588   |
| 475  | 2189.9693 | 712.9836  | 3073.9931 | 747.1546   | 1215.6927 | -244.4455   |
| 500  | 2206.2333 | 767.9407  | 3186.7471 | 825.4236   | 1270.6498 | -322.7145   |
| 525  | 2220.4312 | 823.2769  | 3294.7409 | 906.4513   | 1325.9860 | -403.7422   |
| 550  | 2232.8938 | 878.9470  | 3398.3298 | 990.1230   | 1381.6561 | -487.4139   |
| 575  | 2243.8847 | 934.9095  | 3497.8329 | 1076.3327  | 1437.6186 | -573.6236   |
| 600  | 2253.6244 | 991.1305  | 3593.5421 | 1164.9820  | 1493.8396 | -662.2729   |
| 650  | 2270.0380 | 1104.2364 | 3774.6005 | 1349.2392  | 1606.9455 | -846.5301   |
| 700  | 2283.2390 | 1218.0794 | 3943.3286 | 1542.2341  | 1720.7885 | -1039.5250  |
| 750  | 2294.0063 | 1332.5187 | 4101.2353 | 1743.3896  | 1835.2278 | -1240.6805  |
| 800  | 2302.8970 | 1447.4471 | 4249.5803 | 1952.1963  | 1950.1563 | -1449.4872  |
| 850  | 2310.3194 | 1562.7818 | 4389.4213 | 2168.2028  | 2065.4909 | -1665.4937  |
| 900  | 2316.5794 | 1678.4581 | 4521.6586 | 2391.0086  | 2181.1672 | -1888.2995  |
| 950  | 2321.9040 | 1794.4228 | 4647.0556 | 2620.2519  | 2297.1319 | -2117.5428  |
| 1000 | 2326.4695 | 1910.6345 | 4766.2724 | 2855.6086  | 2413.3436 | -2352.8995  |
| 1050 | 2330.4139 | 2027.0585 | 4879.8785 | 3096.7832  | 2529.7676 | -2594.0741  |
| 1100 | 2333.8444 | 2143.6658 | 4988.3705 | 3343.5078  | 2646.3750 | -2840.7986  |
| 1150 | 2336.8451 | 2260.4343 | 5092.1821 | 3595.5390  | 2763.1434 | -3092.8299  |
| 1200 | 2339.4858 | 2377.3427 | 5191.6935 | 3852.6511  | 2880.0518 | -3349.9420  |
| 1250 | 2341.8205 | 2494.3764 | 5287.2447 | 4114.6386  | 2997.0856 | -3611.9295  |
| 1300 | 2343.8958 | 2611.5193 | 5379.1342 | 4381.3115  | 3114.2284 | -3878.6024  |
| 1350 | 2345.7483 | 2728.7605 | 5467.6289 | 4652.4921  | 3231.4696 | -4149.7830  |
| 1400 | 2347.4071 | 2846.0895 | 5552.9682 | 4928.0185  | 3348.7986 | -4425.3094  |
| 1450 | 2348.9004 | 2963.4977 | 5635.3692 | 5207.7371  | 3466.2068 | -4705.0280  |
| 1500 | 2350.2481 | 3080.9762 | 5715.0239 | 5491.5062  | 3583.6854 | -4988.7971  |
| 1550 | 2351.4695 | 3198.5185 | 5792.1069 | 5779.1926  | 3701.2276 | -5276.4835  |
| 1600 | 2352.5787 | 3316.1196 | 5866.7812 | 6070.6728  | 3818.8287 | -5567.9636  |
| 1650 | 2353.5897 | 3433.7738 | 5939.1906 | 6365.8290  | 3936.4829 | -5863.1199  |
| 1700 | 2354.5135 | 3551.4762 | 6009.4657 | 6664.5524  | 4054.1854 | -6161.8433  |
| 1750 | 2355.3607 | 3669.2231 | 6077.7295 | 6966.7396  | 4171.9322 | -6464.0304  |
| 1800 | 2356.1381 | 3787.0085 | 6144.0926 | 7272.2892  | 4289.7176 | -6769.5801  |
| 1850 | 2356.8540 | 3904.8334 | 6208.6589 | 7581.1146  | 4407.5425 | -7078.4055  |
| 1900 | 2357.5142 | 4022.6922 | 6271.5208 | 7893.1240  | 4525.4013 | -7390.4148  |
| 1950 | 2358.1253 | 4140.5827 | 6332.7663 | 8208.2363  | 4643.2919 | -7705.5272  |
| 2000 | 2358.6907 | 4258.5032 | 6392.4753 | 8526.3706  | 4761.2123 | -8023.6614  |
| 2050 | 2359.2162 | 4376.4498 | 6450.7252 | 8847.4544  | 4879.1589 | -8344.7453  |
| 2100 | 2359.7042 | 4494.4214 | 6507.5823 | 9171.4163  | 4997.1305 | -8668.7072  |
| 2150 | 2360.1590 | 4612.4181 | 6563.1124 | 9498.1860  | 5115.1272 | -8995.4769  |
| 2200 | 2360.5831 | 4730.4360 | 6617.3762 | 9827.7027  | 5233.1452 | -9324.9936  |
| 2250 | 2360.9788 | 4848.4752 | 6670.4295 | 10159.8948 | 5351.1843 | -9657.1857  |
| 2300 | 2361.3505 | 4966.5327 | 6722.3262 | 10494.7182 | 5469.2418 | -9992.0090  |
| 2350 | 2361.6981 | 5084.6076 | 6773.1137 | 10832.1080 | 5587.3167 | -10329.3989 |
| 2400 | 2362.0248 | 5202.7017 | 6822.8386 | 11172.0064 | 5705.4108 | -10669.2973 |

|      |           |           |           |            |           |             |
|------|-----------|-----------|-----------|------------|-----------|-------------|
| 2450 | 2362.3316 | 5320.8094 | 6871.5451 | 11514.3749 | 5823.5185 | -11011.6658 |
| 2500 | 2362.6193 | 5438.9315 | 6919.2729 | 11859.1459 | 5941.6406 | -11356.4368 |
| 2550 | 2362.8912 | 5557.0681 | 6966.0628 | 12206.2807 | 6059.7773 | -11703.5716 |
| 2600 | 2363.1481 | 5675.2192 | 7011.9481 | 12555.7312 | 6177.9283 | -12053.0221 |
| 2650 | 2363.3892 | 5793.3829 | 7056.9620 | 12907.4588 | 6296.0920 | -12404.7496 |
| 2700 | 2363.6179 | 5911.5571 | 7101.1420 | 13261.4055 | 6414.2662 | -12758.6964 |
| 2750 | 2363.8349 | 6029.7420 | 7144.5163 | 13617.5520 | 6532.4511 | -13114.8429 |
| 2800 | 2364.0394 | 6147.9384 | 7187.1082 | 13975.8406 | 6650.6475 | -13473.1315 |
| 2850 | 2364.2340 | 6266.1454 | 7228.9527 | 14336.2422 | 6768.8545 | -13833.5331 |
| 2900 | 2364.4177 | 6384.3602 | 7270.0729 | 14698.7278 | 6887.0693 | -14196.0187 |
| 2950 | 2364.5932 | 6502.5846 | 7310.4923 | 15063.2300 | 7005.2937 | -14560.5209 |
| 3000 | 2364.7595 | 6620.8187 | 7350.2365 | 15429.7584 | 7123.5278 | -14927.0493 |

Thermodynamic Properties for empirical formula  $\text{Ce}_{31}\text{FeO}_{64}$  unit

Zero-point energy = 512.59 kJ/mol

| T<br>K | Cv<br>J K <sup>-1</sup> mol <sup>-1</sup> | E(T) - E(0)<br>kJ mol <sup>-1</sup> | S(T)<br>J K <sup>-1</sup> mol <sup>-1</sup> | -(A(T) - E(0))<br>kJ mol <sup>-1</sup> | E(T)<br>kJ mol <sup>-1</sup> | A(T)<br>kJ mol <sup>-1</sup> |
|--------|-------------------------------------------|-------------------------------------|---------------------------------------------|----------------------------------------|------------------------------|------------------------------|
| 0      | 0.0000                                    | 0.0000                              | 0.0000                                      | 0.0000                                 | 512.5876                     | 512.5876                     |
| 1      | 0.0000                                    | 0.0000                              | 0.0000                                      | 0.0000                                 | 512.5876                     | 512.5876                     |
| 2      | 0.0003                                    | 0.0000                              | 0.0000                                      | 0.0000                                 | 512.5876                     | 512.5876                     |
| 3      | 0.0184                                    | 0.0001                              | 0.0021                                      | 0.0000                                 | 512.5877                     | 512.5876                     |
| 4      | 0.1297                                    | 0.0001                              | 0.0193                                      | 0.0000                                 | 512.5877                     | 512.5876                     |
| 5      | 0.4124                                    | 0.0004                              | 0.0750                                      | 0.0000                                 | 512.5880                     | 512.5876                     |
| 10     | 4.6512                                    | 0.0112                              | 1.4132                                      | 0.0030                                 | 512.5988                     | 512.5846                     |
| 15     | 13.2186                                   | 0.0537                              | 4.7475                                      | 0.0175                                 | 512.6413                     | 512.5701                     |
| 20     | 29.1147                                   | 0.1556                              | 10.5014                                     | 0.0543                                 | 512.7432                     | 512.5332                     |
| 25     | 55.4135                                   | 0.3625                              | 19.6231                                     | 0.1281                                 | 512.9501                     | 512.4594                     |
| 30     | 91.7280                                   | 0.7265                              | 32.7993                                     | 0.2574                                 | 513.3141                     | 512.3301                     |
| 35     | 135.7841                                  | 1.2927                              | 50.1645                                     | 0.4631                                 | 513.8803                     | 512.1244                     |
| 40     | 185.2123                                  | 2.0932                              | 71.4742                                     | 0.7656                                 | 514.6808                     | 511.8220                     |
| 45     | 238.1733                                  | 3.1506                              | 96.3194                                     | 1.1838                                 | 515.7382                     | 511.4038                     |
| 50     | 293.3765                                  | 4.4788                              | 124.2551                                    | 1.7339                                 | 517.0663                     | 510.8536                     |
| 55     | 349.9425                                  | 6.0867                              | 154.8617                                    | 2.4308                                 | 518.6742                     | 510.1568                     |
| 60     | 407.2679                                  | 7.9794                              | 187.7646                                    | 3.2864                                 | 520.5670                     | 509.3012                     |
| 65     | 464.9252                                  | 10.1598                             | 222.6392                                    | 4.3116                                 | 522.7474                     | 508.2759                     |
| 70     | 522.5968                                  | 12.6286                             | 259.2050                                    | 5.5157                                 | 525.2161                     | 507.0719                     |
| 75     | 580.0312                                  | 15.3853                             | 297.2210                                    | 6.9061                                 | 527.9728                     | 505.6814                     |
| 80     | 637.0199                                  | 18.4282                             | 336.4775                                    | 8.4899                                 | 531.0158                     | 504.0976                     |
| 85     | 693.3812                                  | 21.7544                             | 376.7913                                    | 10.2727                                | 534.3420                     | 502.3149                     |
| 90     | 748.9539                                  | 25.3606                             | 418.0010                                    | 12.2592                                | 537.9482                     | 500.3283                     |
| 95     | 803.5935                                  | 29.2424                             | 459.9632                                    | 14.4540                                | 541.8299                     | 498.1336                     |
| 100    | 857.1721                                  | 33.3947                             | 502.5494                                    | 16.8599                                | 545.9823                     | 495.7276                     |
| 105    | 909.5777                                  | 37.8121                             | 545.6440                                    | 19.4802                                | 550.3997                     | 493.1074                     |
| 110    | 960.7161                                  | 42.4883                             | 589.1428                                    | 22.3171                                | 555.0758                     | 490.2705                     |
| 115    | 1010.5059                                 | 47.4169                             | 632.9520                                    | 25.3722                                | 560.0045                     | 487.2154                     |
| 120    | 1058.8855                                 | 52.5910                             | 676.9859                                    | 28.6469                                | 565.1785                     | 483.9407                     |
| 125    | 1105.8068                                 | 58.0033                             | 721.1679                                    | 32.1422                                | 570.5909                     | 480.4453                     |
| 130    | 1151.2373                                 | 63.6465                             | 765.4285                                    | 35.8587                                | 576.2341                     | 476.7289                     |
| 135    | 1195.1554                                 | 69.5130                             | 809.7049                                    | 39.7964                                | 582.1006                     | 472.7911                     |
| 140    | 1237.5561                                 | 75.5955                             | 853.9411                                    | 43.9556                                | 588.1830                     | 468.6319                     |

|     |           |          |           |           |           |           |
|-----|-----------|----------|-----------|-----------|-----------|-----------|
| 145 | 1278.4394 | 81.8860  | 898.0862  | 48.3357   | 594.4736  | 464.2519  |
| 150 | 1317.8186 | 88.3772  | 942.0949  | 52.9361   | 600.9647  | 459.6515  |
| 155 | 1355.7128 | 95.0617  | 985.9282  | 57.7563   | 607.6492  | 454.8313  |
| 160 | 1392.1486 | 101.9319 | 1029.5494 | 62.7951   | 614.5195  | 449.7925  |
| 165 | 1427.1585 | 108.9806 | 1072.9271 | 68.0513   | 621.5682  | 444.5363  |
| 170 | 1460.7766 | 116.2010 | 1116.0353 | 73.5236   | 628.7886  | 439.0639  |
| 175 | 1493.0436 | 123.5862 | 1158.8484 | 79.2111   | 636.1738  | 433.3765  |
| 180 | 1524.0018 | 131.1292 | 1201.3455 | 85.1116   | 643.7168  | 427.4759  |
| 185 | 1553.6929 | 138.8239 | 1243.5093 | 91.2240   | 651.4115  | 421.3636  |
| 190 | 1582.1635 | 146.6639 | 1285.3238 | 97.5461   | 659.2515  | 415.0415  |
| 195 | 1609.4567 | 154.6437 | 1326.7774 | 104.0764  | 667.2312  | 408.5112  |
| 200 | 1635.6200 | 162.7566 | 1367.8570 | 110.8132  | 675.3442  | 401.7744  |
| 205 | 1660.6974 | 170.9978 | 1408.5548 | 117.7543  | 683.5854  | 394.8332  |
| 210 | 1684.7330 | 179.3618 | 1448.8644 | 124.8979  | 691.9493  | 387.6896  |
| 215 | 1707.7717 | 187.8435 | 1488.7791 | 132.2422  | 700.4311  | 380.3454  |
| 220 | 1729.8550 | 196.4377 | 1528.2946 | 139.7850  | 709.0253  | 372.8025  |
| 225 | 1751.0246 | 205.1404 | 1567.4077 | 147.5244  | 717.7280  | 365.0632  |
| 230 | 1771.3220 | 213.9465 | 1606.1176 | 155.4583  | 726.5341  | 357.1293  |
| 235 | 1790.7854 | 222.8519 | 1644.4217 | 163.5848  | 735.4395  | 349.0028  |
| 240 | 1809.4515 | 231.8529 | 1682.3209 | 171.9017  | 744.4405  | 340.6859  |
| 245 | 1827.3585 | 240.9451 | 1719.8161 | 180.4072  | 753.5327  | 332.1804  |
| 250 | 1844.5387 | 250.1251 | 1756.9079 | 189.0991  | 762.7127  | 323.4884  |
| 255 | 1861.0272 | 259.3893 | 1793.5982 | 197.9755  | 771.9768  | 314.6121  |
| 260 | 1876.8547 | 268.7343 | 1829.8902 | 207.0343  | 781.3218  | 305.5532  |
| 265 | 1892.0528 | 278.1567 | 1865.7865 | 216.2736  | 790.7443  | 296.3140  |
| 270 | 1906.6490 | 287.6538 | 1901.2894 | 225.6914  | 800.2413  | 286.8962  |
| 273 | 1915.5497 | 293.6737 | 1923.4568 | 231.7154  | 806.2613  | 280.8722  |
| 275 | 1920.6722 | 297.2220 | 1936.4041 | 235.2857  | 809.8096  | 277.3019  |
| 277 | 1926.5323 | 301.3578 | 1951.3844 | 239.4651  | 813.9453  | 273.1225  |
| 280 | 1934.1484 | 306.8594 | 1971.1330 | 245.0546  | 819.4469  | 267.5329  |
| 285 | 1947.1032 | 316.5626 | 2005.4819 | 254.9963  | 829.1502  | 257.5913  |
| 290 | 1959.5592 | 326.3294 | 2039.4542 | 265.1087  | 838.9170  | 247.4788  |
| 294 | 1968.2329 | 333.3996 | 2063.6835 | 272.4944  | 845.9872  | 240.0932  |
| 295 | 1971.5412 | 336.1572 | 2073.0548 | 275.3901  | 848.7448  | 237.1975  |
| 296 | 1973.8826 | 338.1299 | 2079.7305 | 277.4665  | 850.7174  | 235.1211  |
| 298 | 1978.8555 | 342.3792 | 2094.0340 | 281.9532  | 854.9668  | 230.6343  |
| 300 | 1983.0693 | 346.0439 | 2106.2879 | 285.8385  | 858.6315  | 226.7491  |
| 310 | 2004.8458 | 365.9848 | 2171.6715 | 307.2294  | 878.5724  | 205.3582  |
| 320 | 2025.0451 | 386.1354 | 2235.6459 | 329.2670  | 898.7229  | 183.3205  |
| 330 | 2043.8018 | 406.4806 | 2298.2508 | 351.9374  | 919.0682  | 160.6502  |
| 340 | 2061.2432 | 427.0067 | 2359.5263 | 375.2273  | 939.5943  | 137.3603  |
| 350 | 2077.4814 | 447.7011 | 2419.5138 | 399.1234  | 960.2887  | 113.4642  |
| 360 | 2092.6180 | 468.5523 | 2478.2525 | 423.6131  | 981.1398  | 88.9745   |
| 370 | 2106.7452 | 489.5503 | 2535.7831 | 448.6841  | 1002.1379 | 63.9034   |
| 373 | 2110.9997 | 496.1934 | 2553.6610 | 456.7000  | 1008.7809 | 55.8876   |
| 380 | 2119.9453 | 510.6835 | 2592.1439 | 474.3245  | 1023.2711 | 38.2630   |
| 390 | 2132.2957 | 531.9460 | 2647.3714 | 500.5229  | 1044.5336 | 12.0647   |
| 400 | 2143.8637 | 553.3271 | 2701.5038 | 527.2680  | 1065.9147 | -14.6805  |
| 425 | 2169.7517 | 607.2557 | 2832.2728 | 596.4530  | 1119.8432 | -83.8654  |
| 450 | 2191.9448 | 661.7834 | 2956.9365 | 668.8298  | 1174.3709 | -156.2422 |
| 475 | 2211.0923 | 716.8273 | 3075.9745 | 744.2520  | 1229.4149 | -231.6644 |
| 500 | 2227.7122 | 772.3160 | 3189.8210 | 822.5844  | 1284.9036 | -309.9968 |
| 525 | 2242.2210 | 828.1945 | 3298.8708 | 903.7021  | 1340.7821 | -391.1145 |
| 550 | 2254.9530 | 884.4117 | 3403.4781 | 987.4898  | 1396.9992 | -474.9022 |
| 575 | 2266.1826 | 940.9289 | 3503.9682 | 1073.8407 | 1453.5165 | -561.2531 |

|      |           |           |           |            |           |             |
|------|-----------|-----------|-----------|------------|-----------|-------------|
| 600  | 2276.1326 | 997.7095  | 3600.6302 | 1162.6552  | 1510.2971 | -650.0677   |
| 650  | 2292.8971 | 1111.9501 | 3783.5045 | 1347.3128  | 1624.5376 | -834.7252   |
| 700  | 2306.3808 | 1226.9432 | 3953.9379 | 1540.7958  | 1739.5308 | -1028.2082  |
| 750  | 2317.3759 | 1342.5461 | 4113.4493 | 1742.5215  | 1855.1337 | -1229.9339  |
| 800  | 2326.4545 | 1458.6478 | 4263.3084 | 1951.9776  | 1971.2354 | -1439.3900  |
| 850  | 2334.0340 | 1575.1654 | 4404.5828 | 2168.7068  | 2087.7530 | -1656.1192  |
| 900  | 2340.4245 | 1692.0304 | 4538.1779 | 2392.3047  | 2204.6179 | -1879.7172  |
| 950  | 2345.8606 | 1809.1905 | 4664.8678 | 2622.4077  | 2321.7781 | -2109.8201  |
| 1000 | 2350.5217 | 1926.6016 | 4785.3168 | 2858.6848  | 2439.1892 | -2346.0972  |
| 1050 | 2354.5492 | 2044.2307 | 4900.0978 | 3100.8417  | 2556.8183 | -2588.2541  |
| 1100 | 2358.0505 | 2162.0470 | 5009.7146 | 3348.6054  | 2674.6345 | -2836.0178  |
| 1150 | 2361.1144 | 2280.0273 | 5114.6030 | 3601.7307  | 2792.6148 | -3089.1432  |
| 1200 | 2363.8099 | 2398.1504 | 5215.1496 | 3859.9901  | 2910.7380 | -3347.4025  |
| 1250 | 2366.1929 | 2516.4009 | 5311.6944 | 4123.1759  | 3028.9884 | -3610.5884  |
| 1300 | 2368.3114 | 2634.7642 | 5404.5400 | 4391.0954  | 3147.3518 | -3878.5078  |
| 1350 | 2370.2013 | 2753.2269 | 5493.9568 | 4663.5699  | 3265.8145 | -4150.9823  |
| 1400 | 2371.8958 | 2871.7794 | 5580.1866 | 4940.4345  | 3384.3670 | -4427.8469  |
| 1450 | 2373.4190 | 2990.4129 | 5663.4473 | 5221.5357  | 3503.0005 | -4708.9482  |
| 1500 | 2374.7951 | 3109.1178 | 5743.9334 | 5506.7290  | 3621.7054 | -4994.1414  |
| 1550 | 2376.0414 | 3227.8874 | 5821.8238 | 5795.8819  | 3740.4750 | -5283.2944  |
| 1600 | 2377.1739 | 3346.7177 | 5897.2772 | 6088.8683  | 3859.3053 | -5576.2807  |
| 1650 | 2378.2057 | 3465.6031 | 5970.4432 | 6385.5673  | 3978.1906 | -5872.9798  |
| 1700 | 2379.1485 | 3584.5357 | 6041.4533 | 6685.8711  | 4097.1233 | -6173.2835  |
| 1750 | 2380.0124 | 3703.5146 | 6110.4321 | 6989.6763  | 4216.1022 | -6477.0888  |
| 1800 | 2380.8065 | 3822.5350 | 6177.4903 | 7296.8778  | 4335.1226 | -6784.2903  |
| 1850 | 2381.5373 | 3941.5931 | 6242.7327 | 7607.3888  | 4454.1806 | -7094.8012  |
| 1900 | 2382.2108 | 4060.6868 | 6306.2522 | 7921.1195  | 4573.2744 | -7408.5319  |
| 1950 | 2382.8344 | 4179.8115 | 6368.1396 | 8237.9849  | 4692.3990 | -7725.3974  |
| 2000 | 2383.4114 | 4298.9679 | 6428.4755 | 8557.9032  | 4811.5555 | -8045.3156  |
| 2050 | 2383.9477 | 4418.1504 | 6487.3348 | 8880.8038  | 4930.7380 | -8368.2163  |
| 2100 | 2384.4457 | 4537.3609 | 6544.7872 | 9206.6106  | 5049.9485 | -8694.0230  |
| 2150 | 2384.9105 | 4656.5936 | 6600.9010 | 9535.2550  | 5169.1812 | -9022.6674  |
| 2200 | 2385.3429 | 4775.8485 | 6655.7336 | 9866.6743  | 5288.4361 | -9354.0868  |
| 2250 | 2385.7469 | 4895.1256 | 6709.3439 | 10200.8030 | 5407.7131 | -9688.2154  |
| 2300 | 2386.1261 | 5014.4229 | 6761.7835 | 10537.5849 | 5527.0105 | -10024.9974 |
| 2350 | 2386.4811 | 5133.7366 | 6813.1048 | 10876.9624 | 5646.3242 | -10364.3748 |
| 2400 | 2386.8137 | 5253.0677 | 6863.3511 | 11218.8774 | 5765.6553 | -10706.2898 |
| 2450 | 2387.1272 | 5372.4162 | 6912.5680 | 11563.2720 | 5885.0038 | -11050.6845 |
| 2500 | 2387.4215 | 5491.7801 | 6960.7980 | 11910.1078 | 6004.3677 | -11397.5202 |
| 2550 | 2387.6984 | 5611.1566 | 7008.0785 | 12259.3363 | 6123.7441 | -11746.7488 |
| 2600 | 2387.9603 | 5730.5475 | 7054.4460 | 12610.8999 | 6243.1350 | -12098.3123 |
| 2650 | 2388.2072 | 5849.9519 | 7099.9347 | 12964.7597 | 6362.5395 | -12452.1722 |
| 2700 | 2388.4408 | 5969.3660 | 7144.5778 | 13320.8677 | 6481.9536 | -12808.2802 |
| 2750 | 2388.6612 | 6088.7936 | 7188.4053 | 13679.1949 | 6601.3811 | -13166.6073 |
| 2800 | 2388.8707 | 6208.2318 | 7231.4470 | 14039.6929 | 6720.8193 | -13527.1054 |
| 2850 | 2389.0686 | 6327.6796 | 7273.7305 | 14402.3233 | 6840.2672 | -13889.7358 |
| 2900 | 2389.2573 | 6447.1371 | 7315.2822 | 14767.0474 | 6959.7247 | -14254.4599 |
| 2950 | 2389.4361 | 6566.6033 | 7356.1273 | 15133.8363 | 7079.1909 | -14621.2488 |
| 3000 | 2389.6057 | 6686.0801 | 7396.2880 | 15502.6514 | 7198.6677 | -14990.0639 |

Thermodynamic Properties for empirical formula  $\text{Ce}_{31}\text{CoO}_{64}$  unit

Zero-point energy = 514.10 kJ/mol

| T<br>K | Cv<br>J K <sup>-1</sup> mol <sup>-1</sup> | E(T) - E(0)<br>kJ mol <sup>-1</sup> | S(T)<br>J K <sup>-1</sup> mol <sup>-1</sup> | -(A(T) - E(0))<br>kJ mol <sup>-1</sup> | E(T)<br>kJ mol <sup>-1</sup> | A(T)<br>kJ mol <sup>-1</sup> |
|--------|-------------------------------------------|-------------------------------------|---------------------------------------------|----------------------------------------|------------------------------|------------------------------|
| 0      | 0.0000                                    | 0.0000                              | 0.0000                                      | 0.0000                                 | 514.1030                     | 514.1030                     |
| 1      | 0.0000                                    | 0.0000                              | 0.0000                                      | 0.0000                                 | 514.1030                     | 514.1030                     |
| 2      | 0.0002                                    | 0.0000                              | 0.0000                                      | 0.0000                                 | 514.1030                     | 514.1030                     |
| 3      | 0.0117                                    | 0.0000                              | 0.0012                                      | 0.0000                                 | 514.1030                     | 514.1030                     |
| 4      | 0.1004                                    | 0.0001                              | 0.0137                                      | 0.0000                                 | 514.1031                     | 514.1030                     |
| 5      | 0.3653                                    | 0.0003                              | 0.0605                                      | 0.0001                                 | 514.1033                     | 514.1029                     |
| 10     | 4.9588                                    | 0.0115                              | 1.4420                                      | 0.0029                                 | 514.1144                     | 514.1001                     |
| 15     | 14.0629                                   | 0.0569                              | 5.0016                                      | 0.0181                                 | 514.1599                     | 514.0848                     |
| 20     | 30.6010                                   | 0.1645                              | 11.0826                                     | 0.0571                                 | 514.2675                     | 514.0458                     |
| 25     | 57.6782                                   | 0.3807                              | 20.6179                                     | 0.1347                                 | 514.4837                     | 513.9683                     |
| 30     | 94.8086                                   | 0.7582                              | 34.2791                                     | 0.2702                                 | 514.8611                     | 513.8328                     |
| 35     | 139.6384                                  | 1.3416                              | 52.1781                                     | 0.4845                                 | 515.4446                     | 513.6184                     |
| 40     | 189.7550                                  | 2.1634                              | 74.0487                                     | 0.7986                                 | 516.2664                     | 513.3044                     |
| 45     | 243.2933                                  | 3.2449                              | 99.4634                                     | 1.2311                                 | 517.3479                     | 512.8719                     |
| 50     | 298.9461                                  | 4.5997                              | 127.9631                                    | 1.7983                                 | 518.7027                     | 512.3047                     |
| 55     | 355.8259                                  | 6.2363                              | 159.1162                                    | 2.5151                                 | 520.3393                     | 511.5879                     |
| 60     | 413.3284                                  | 8.1591                              | 192.5397                                    | 3.3933                                 | 522.2621                     | 510.7097                     |
| 65     | 471.0317                                  | 10.3700                             | 227.9019                                    | 4.4436                                 | 524.4729                     | 509.6593                     |
| 70     | 528.6291                                  | 12.8692                             | 264.9183                                    | 5.6751                                 | 526.9722                     | 508.4279                     |
| 75     | 585.8836                                  | 15.6556                             | 303.3450                                    | 7.0950                                 | 529.7586                     | 507.0079                     |
| 80     | 642.6016                                  | 18.7270                             | 342.9709                                    | 8.7105                                 | 532.8300                     | 505.3925                     |
| 85     | 698.6181                                  | 22.0804                             | 383.6131                                    | 10.5265                                | 536.1833                     | 503.5764                     |
| 90     | 753.7873                                  | 25.7118                             | 425.1109                                    | 12.5481                                | 539.8148                     | 501.5549                     |
| 95     | 807.9801                                  | 29.6166                             | 467.3226                                    | 14.7788                                | 543.7195                     | 499.3242                     |
| 100    | 861.0816                                  | 33.7897                             | 510.1218                                    | 17.2222                                | 547.8927                     | 496.8807                     |
| 105    | 912.9933                                  | 38.2254                             | 553.3952                                    | 19.8808                                | 552.3283                     | 494.2222                     |
| 110    | 963.6295                                  | 42.9175                             | 597.0416                                    | 22.7567                                | 557.0205                     | 491.3462                     |
| 115    | 1012.9204                                 | 47.8594                             | 640.9690                                    | 25.8516                                | 561.9624                     | 488.2514                     |
| 120    | 1060.8095                                 | 53.0442                             | 685.0953                                    | 29.1666                                | 567.1472                     | 484.9363                     |
| 125    | 1107.2552                                 | 58.4650                             | 729.3462                                    | 32.7027                                | 572.5680                     | 481.4002                     |
| 130    | 1152.2284                                 | 64.1143                             | 773.6546                                    | 36.4602                                | 578.2173                     | 477.6428                     |
| 135    | 1195.7133                                 | 69.9848                             | 817.9603                                    | 40.4392                                | 584.0877                     | 473.6638                     |
| 140    | 1237.7041                                 | 76.0688                             | 862.2091                                    | 44.6396                                | 590.1718                     | 469.4634                     |
| 145    | 1278.2057                                 | 82.3592                             | 906.3525                                    | 49.0611                                | 596.4622                     | 465.0418                     |
| 150    | 1317.2291                                 | 88.8483                             | 950.3479                                    | 53.7029                                | 602.9513                     | 460.4001                     |
| 155    | 1354.7957                                 | 95.5290                             | 994.1554                                    | 58.5642                                | 609.6320                     | 455.5388                     |
| 160    | 1390.9306                                 | 102.3939                            | 1037.7434                                   | 63.6440                                | 616.4968                     | 450.4589                     |
| 165    | 1425.6644                                 | 109.4359                            | 1081.0795                                   | 68.9412                                | 623.5388                     | 445.1618                     |
| 170    | 1459.0339                                 | 116.6482                            | 1124.1386                                   | 74.4543                                | 630.7512                     | 439.6486                     |
| 175    | 1491.0764                                 | 124.0241                            | 1166.8977                                   | 80.1819                                | 638.1270                     | 433.9211                     |
| 180    | 1521.8317                                 | 131.5568                            | 1209.3366                                   | 86.1227                                | 645.6597                     | 427.9803                     |
| 185    | 1551.3424                                 | 139.2400                            | 1251.4388                                   | 92.2748                                | 653.3429                     | 421.8282                     |
| 190    | 1579.6525                                 | 147.0680                            | 1293.1885                                   | 98.6364                                | 661.1710                     | 415.4665                     |
| 195    | 1606.8052                                 | 155.0346                            | 1334.5748                                   | 105.2059                               | 669.1376                     | 408.8970                     |
| 200    | 1632.8446                                 | 163.1341                            | 1375.5861                                   | 111.9814                               | 677.2370                     | 402.1215                     |
| 205    | 1657.8147                                 | 171.3613                            | 1416.2142                                   | 118.9610                               | 685.4643                     | 395.1420                     |
| 210    | 1681.7589                                 | 179.7105                            | 1456.4531                                   | 126.1429                               | 693.8135                     | 387.9601                     |
| 215    | 1704.7177                                 | 188.1770                            | 1496.2962                                   | 133.5249                               | 702.2800                     | 380.5781                     |
| 220    | 1726.7354                                 | 196.7559                            | 1535.7411                                   | 141.1050                               | 710.8589                     | 372.9979                     |
| 225    | 1747.8509                                 | 205.4427                            | 1574.7835                                   | 148.8814                               | 719.5457                     | 365.2216                     |

|      |           |           |           |           |           |            |
|------|-----------|-----------|-----------|-----------|-----------|------------|
| 230  | 1768.1043 | 214.2329  | 1613.4227 | 156.8521  | 728.3359  | 357.2509   |
| 235  | 1787.5328 | 223.1223  | 1651.6579 | 165.0149  | 737.2252  | 349.0881   |
| 240  | 1806.1731 | 232.1068  | 1689.4880 | 173.3679  | 746.2098  | 340.7351   |
| 245  | 1824.0618 | 241.1827  | 1726.9158 | 181.9091  | 755.2857  | 332.1939   |
| 250  | 1841.2312 | 250.3463  | 1763.9403 | 190.6363  | 764.4493  | 323.4667   |
| 255  | 1857.7139 | 259.5937  | 1800.5658 | 199.5477  | 773.6967  | 314.5552   |
| 260  | 1873.5431 | 268.9222  | 1836.7929 | 208.6412  | 783.0252  | 305.4618   |
| 265  | 1888.7462 | 278.3279  | 1872.6260 | 217.9148  | 792.4309  | 296.1882   |
| 270  | 1903.3531 | 287.8085  | 1908.0674 | 227.3667  | 801.9115  | 286.7363   |
| 273  | 1912.2613 | 293.8181  | 1930.1965 | 233.4120  | 807.9211  | 280.6910   |
| 275  | 1917.3905 | 297.3606  | 1943.1214 | 236.9947  | 811.4636  | 277.1082   |
| 277  | 1923.2589 | 301.4892  | 1958.0767 | 241.1885  | 815.5922  | 272.9145   |
| 280  | 1930.8849 | 306.9812  | 1977.7921 | 246.7971  | 821.0842  | 267.3059   |
| 285  | 1943.8606 | 316.6685  | 2012.0828 | 256.7718  | 830.7714  | 257.3311   |
| 290  | 1956.3406 | 326.4190  | 2045.9994 | 266.9172  | 840.5219  | 247.1858   |
| 294  | 1965.0326 | 333.4777  | 2070.1896 | 274.3264  | 847.5807  | 239.7766   |
| 295  | 1968.3485 | 336.2309  | 2079.5451 | 277.2310  | 850.3338  | 236.8719   |
| 296  | 1970.6957 | 338.2004  | 2086.2100 | 279.3140  | 852.3034  | 234.7890   |
| 298  | 1975.6802 | 342.4429  | 2100.4902 | 283.8146  | 856.5458  | 230.2883   |
| 300  | 1979.9048 | 346.1017  | 2112.7241 | 287.7119  | 860.2046  | 226.3911   |
| 310  | 2001.7445 | 366.0112  | 2178.0055 | 309.1666  | 880.1142  | 204.9363   |
| 320  | 2022.0103 | 386.1310  | 2241.8826 | 331.2670  | 900.2340  | 182.8360   |
| 330  | 2040.8385 | 406.4463  | 2304.3953 | 353.9994  | 920.5493  | 160.1036   |
| 340  | 2058.3531 | 426.9433  | 2365.5834 | 377.3502  | 941.0462  | 136.7528   |
| 350  | 2074.6661 | 447.6092  | 2425.4878 | 401.3065  | 961.7122  | 112.7964   |
| 360  | 2089.8784 | 468.4330  | 2484.1492 | 425.8555  | 982.5360  | 88.2474    |
| 370  | 2104.0812 | 489.4031  | 2541.6050 | 450.9852  | 1003.5061 | 63.1178    |
| 373  | 2108.3599 | 496.0374  | 2559.4604 | 459.0193  | 1010.1404 | 55.0837    |
| 380  | 2117.3578 | 510.5112  | 2597.8959 | 476.6834  | 1024.6142 | 37.4196    |
| 390  | 2129.7822 | 531.7476  | 2653.0577 | 502.9389  | 1045.8506 | 11.1640    |
| 400  | 2141.4233 | 553.1037  | 2707.1269 | 529.7406  | 1067.2066 | -15.6377   |
| 425  | 2167.4877 | 606.9734  | 2837.7529 | 599.0644  | 1121.0763 | -84.9614   |
| 450  | 2189.8446 | 661.4461  | 2962.2918 | 671.5765  | 1175.5490 | -157.4736  |
| 475  | 2209.1434 | 716.4388  | 3081.2201 | 747.1313  | 1230.5418 | -233.0283  |
| 500  | 2225.9029 | 771.8822  | 3194.9701 | 825.5934  | 1285.9852 | -311.4905  |
| 525  | 2240.5398 | 827.7163  | 3303.9343 | 906.8389  | 1341.8193 | -392.7359  |
| 550  | 2253.3891 | 883.8930  | 3408.4677 | 990.7523  | 1397.9959 | -476.6493  |
| 575  | 2264.7251 | 940.3726  | 3508.8895 | 1077.2271 | 1454.4755 | -563.1242  |
| 600  | 2274.7715 | 997.1185  | 3605.4925 | 1166.1640 | 1511.2214 | -652.0610  |
| 650  | 2291.7065 | 1111.2953 | 3788.2654 | 1351.0619 | 1625.3983 | -836.9589  |
| 700  | 2305.3306 | 1226.2325 | 3958.6148 | 1544.7812 | 1740.3354 | -1030.6783 |
| 750  | 2316.4455 | 1341.7852 | 4118.0581 | 1746.7395 | 1855.8882 | -1232.6365 |
| 800  | 2325.6255 | 1457.8435 | 4267.8606 | 1956.4242 | 1971.9465 | -1442.3213 |
| 850  | 2333.2907 | 1574.3216 | 4409.0868 | 2173.3801 | 2088.4245 | -1659.2772 |
| 900  | 2339.7552 | 1691.1518 | 4542.6428 | 2397.2019 | 2205.2547 | -1883.0990 |
| 950  | 2345.2544 | 1808.2791 | 4669.2977 | 2627.5268 | 2322.3821 | -2113.4239 |
| 1000 | 2349.9713 | 1925.6622 | 4789.7160 | 2864.0249 | 2439.7652 | -2349.9219 |
| 1050 | 2354.0462 | 2043.2643 | 4904.4729 | 3106.4008 | 2557.3673 | -2592.2978 |
| 1100 | 2357.5899 | 2161.0574 | 5014.0665 | 3354.3825 | 2675.1604 | -2840.2796 |
| 1150 | 2360.6912 | 2279.0146 | 5118.9357 | 3607.7259 | 2793.1175 | -3093.6230 |
| 1200 | 2363.4192 | 2397.1184 | 5219.4657 | 3866.2014 | 2911.2213 | -3352.0984 |
| 1250 | 2365.8320 | 2515.3505 | 5315.9938 | 4129.6024 | 3029.4535 | -3615.4995 |
| 1300 | 2367.9763 | 2633.6955 | 5408.8262 | 4397.7361 | 3147.7985 | -3883.6331 |
| 1350 | 2369.8895 | 2752.1419 | 5498.2313 | 4670.4248 | 3266.2448 | -4156.3218 |
| 1400 | 2371.6056 | 2870.6799 | 5584.4503 | 4947.5016 | 3384.7828 | -4433.3987 |

|      |           |           |           |            |           |             |
|------|-----------|-----------|-----------|------------|-----------|-------------|
| 1450 | 2373.1480 | 2989.2989 | 5667.7002 | 5228.8161  | 3503.4019 | -4714.7132  |
| 1500 | 2374.5415 | 3107.9903 | 5748.1780 | 5514.2226  | 3622.0933 | -5000.1196  |
| 1550 | 2375.8036 | 3226.7492 | 5826.0592 | 5803.5878  | 3740.8522 | -5289.4849  |
| 1600 | 2376.9502 | 3345.5680 | 5901.5067 | 6096.7845  | 3859.6710 | -5582.6815  |
| 1650 | 2377.9953 | 3464.4418 | 5974.6653 | 6393.6958  | 3978.5447 | -5879.5929  |
| 1700 | 2378.9498 | 3583.3647 | 6045.6696 | 6694.2099  | 4097.4677 | -6180.1070  |
| 1750 | 2379.8245 | 3702.3331 | 6114.6426 | 6998.2255  | 4216.4360 | -6484.1225  |
| 1800 | 2380.6285 | 3821.3448 | 6181.6967 | 7305.6393  | 4335.4478 | -6791.5363  |
| 1850 | 2381.3685 | 3940.3942 | 6246.9323 | 7616.3606  | 4454.4971 | -7102.2576  |
| 1900 | 2382.0511 | 4059.4783 | 6310.4485 | 7930.2997  | 4573.5812 | -7416.1967  |
| 1950 | 2382.6822 | 4178.5961 | 6372.3318 | 8247.3745  | 4692.6991 | -7733.2715  |
| 2000 | 2383.2676 | 4297.7449 | 6432.6644 | 8567.5021  | 4811.8478 | -8053.3992  |
| 2050 | 2383.8097 | 4416.9206 | 6491.5195 | 8890.6122  | 4931.0236 | -8376.5092  |
| 2100 | 2384.3144 | 4536.1234 | 6548.9694 | 9216.6283  | 5050.2264 | -8702.5253  |
| 2150 | 2384.7850 | 4655.3503 | 6605.0791 | 9545.4821  | 5169.4533 | -9031.3791  |
| 2200 | 2385.2231 | 4774.6013 | 6659.9100 | 9877.1098  | 5288.7043 | -9363.0068  |
| 2250 | 2385.6330 | 4893.8707 | 6713.5169 | 10211.4459 | 5407.9736 | -9697.3429  |
| 2300 | 2386.0163 | 5013.1632 | 6765.9557 | 10548.4401 | 5527.2661 | -10034.3371 |
| 2350 | 2386.3764 | 5132.4711 | 6817.2729 | 10888.0202 | 5646.5741 | -10373.9172 |
| 2400 | 2386.7131 | 5251.7984 | 6867.5183 | 11230.1474 | 5765.9013 | -10716.0445 |
| 2450 | 2387.0307 | 5371.1410 | 6916.7344 | 11574.7544 | 5885.2440 | -11060.6514 |
| 2500 | 2387.3284 | 5490.4982 | 6964.9603 | 11921.7927 | 6004.6012 | -11407.6898 |
| 2550 | 2387.6094 | 5609.8718 | 7012.2399 | 12271.2239 | 6123.9747 | -11757.1209 |
| 2600 | 2387.8738 | 5729.2588 | 7058.6033 | 12622.9997 | 6243.3618 | -12108.8967 |
| 2650 | 2388.1241 | 5848.6575 | 7104.0911 | 12977.0718 | 6362.7604 | -12462.9689 |
| 2700 | 2388.3610 | 5968.0696 | 7148.7334 | 13333.3921 | 6482.1726 | -12819.2891 |
| 2750 | 2388.5839 | 6087.4914 | 7192.5601 | 13691.9219 | 6601.5944 | -13177.8189 |
| 2800 | 2388.7967 | 6206.9257 | 7235.6001 | 14052.6322 | 6721.0287 | -13538.5292 |
| 2850 | 2388.9971 | 6326.3707 | 7277.8827 | 14415.4652 | 6840.4737 | -13901.3622 |
| 2900 | 2389.1875 | 6445.8253 | 7319.4329 | 14780.4016 | 6959.9283 | -14266.2986 |
| 2950 | 2389.3687 | 6565.2876 | 7360.2762 | 15147.3931 | 7079.3906 | -14633.2901 |
| 3000 | 2389.5409 | 6684.7596 | 7400.4378 | 15516.4108 | 7198.8626 | -15002.3079 |

Thermodynamic Properties for empirical formula  $\text{Ce}_{31}\text{NiO}_{64}$  unit

Zero-point energy = 515.99 kJ/mol

| T<br>K | $C_v$<br>$\text{J K}^{-1} \text{mol}^{-1}$ | $E(T) - E(0)$<br>$\text{kJ mol}^{-1}$ | $S(T)$<br>$\text{J K}^{-1} \text{mol}^{-1}$ | $-(A(T) - E(0))$<br>$\text{kJ mol}^{-1}$ | $E(T)$<br>$\text{kJ mol}^{-1}$ | $A(T)$<br>$\text{kJ mol}^{-1}$ |
|--------|--------------------------------------------|---------------------------------------|---------------------------------------------|------------------------------------------|--------------------------------|--------------------------------|
| 0      | 0.0000                                     | 0.0000                                | 0.0000                                      | 0.0000                                   | 515.9904                       | 515.9904                       |
| 1      | 0.0000                                     | 0.0000                                | 0.0000                                      | 0.0000                                   | 515.9904                       | 515.9904                       |
| 2      | 0.0001                                     | 0.0000                                | 0.0000                                      | 0.0000                                   | 515.9904                       | 515.9904                       |
| 3      | 0.0041                                     | 0.0000                                | 0.0004                                      | 0.0000                                   | 515.9904                       | 515.9904                       |
| 4      | 0.0367                                     | 0.0000                                | 0.0049                                      | 0.0000                                   | 515.9904                       | 515.9904                       |
| 5      | 0.1406                                     | 0.0002                                | 0.0226                                      | 0.0000                                   | 515.9906                       | 515.9904                       |
| 10     | 2.7403                                     | 0.0057                                | 0.6945                                      | 0.0014                                   | 515.9961                       | 515.9891                       |
| 15     | 9.9871                                     | 0.0351                                | 2.9840                                      | 0.0096                                   | 516.0255                       | 515.9808                       |
| 20     | 25.0687                                    | 0.1186                                | 7.6864                                      | 0.0351                                   | 516.1090                       | 515.9553                       |
| 25     | 50.9762                                    | 0.3041                                | 15.8556                                     | 0.0923                                   | 516.2945                       | 515.8981                       |
| 30     | 87.2732                                    | 0.6458                                | 28.2163                                     | 0.2007                                   | 516.6362                       | 515.7897                       |
| 35     | 131.5683                                   | 1.1901                                | 44.9103                                     | 0.3817                                   | 517.1806                       | 515.6087                       |
| 40     | 181.3578                                   | 1.9706                                | 65.6800                                     | 0.6566                                   | 517.9610                       | 515.3338                       |

|     |           |          |           |          |          |          |
|-----|-----------|----------|-----------|----------|----------|----------|
| 45  | 234.6985  | 3.0096   | 90.0932   | 1.0445   | 519.0000 | 514.9459 |
| 50  | 290.2372  | 4.3212   | 117.6808  | 1.5629   | 520.3116 | 514.4275 |
| 55  | 347.0643  | 5.9141   | 148.0011  | 2.2260   | 521.9045 | 513.7644 |
| 60  | 404.5662  | 7.7929   | 180.6618  | 3.0467   | 523.7833 | 512.9437 |
| 65  | 462.3174  | 9.9601   | 215.3242  | 4.0359   | 525.9505 | 511.9545 |
| 70  | 520.0074  | 12.4160  | 251.6980  | 5.2028   | 528.4064 | 510.7876 |
| 75  | 577.3951  | 15.1596  | 289.5341  | 6.5553   | 531.1500 | 509.4351 |
| 80  | 634.2824  | 18.1890  | 328.6174  | 8.1002   | 534.1794 | 507.8902 |
| 85  | 690.4985  | 21.5013  | 368.7612  | 9.8432   | 537.4917 | 506.1472 |
| 90  | 745.8919  | 25.0926  | 409.8012  | 11.7893  | 541.0831 | 504.2012 |
| 95  | 800.3278  | 28.9586  | 451.5925  | 13.9425  | 544.9490 | 502.0479 |
| 100 | 853.6867  | 33.0941  | 494.0056  | 16.3062  | 549.0845 | 499.6842 |
| 105 | 905.8644  | 37.4934  | 536.9245  | 18.8833  | 553.4838 | 497.1071 |
| 110 | 956.7708  | 42.1506  | 580.2453  | 21.6761  | 558.1410 | 494.3143 |
| 115 | 1006.3328 | 47.0589  | 623.8741  | 24.6862  | 563.0493 | 491.3042 |
| 120 | 1054.4913 | 52.2115  | 667.7257  | 27.9151  | 568.2019 | 488.0753 |
| 125 | 1101.2031 | 57.6013  | 711.7242  | 31.3637  | 573.5918 | 484.6267 |
| 130 | 1146.4357 | 63.2210  | 755.8003  | 35.0325  | 579.2114 | 480.9579 |
| 135 | 1190.1733 | 69.0630  | 799.8920  | 38.9216  | 585.0534 | 477.0688 |
| 140 | 1232.4069 | 75.1202  | 843.9438  | 43.0313  | 591.1106 | 472.9591 |
| 145 | 1273.1422 | 81.3846  | 887.9051  | 47.3610  | 597.3750 | 468.6294 |
| 150 | 1312.3900 | 87.8490  | 931.7325  | 51.9101  | 603.8394 | 464.0804 |
| 155 | 1350.1712 | 94.5059  | 975.3854  | 56.6780  | 610.4963 | 459.3124 |
| 160 | 1386.5106 | 101.3483 | 1018.8295 | 61.6635  | 617.3387 | 454.3269 |
| 165 | 1421.4390 | 108.3686 | 1062.0326 | 66.8657  | 624.3590 | 449.1247 |
| 170 | 1454.9930 | 115.5603 | 1104.9687 | 72.2833  | 631.5507 | 443.7071 |
| 175 | 1487.2101 | 122.9163 | 1147.6130 | 77.9149  | 638.9067 | 438.0755 |
| 180 | 1518.1318 | 130.4301 | 1189.9455 | 83.7588  | 646.4205 | 432.2316 |
| 185 | 1547.8005 | 138.0955 | 1231.9488 | 89.8136  | 654.0859 | 426.1768 |
| 190 | 1576.2602 | 145.9060 | 1273.6061 | 96.0777  | 661.8964 | 419.9128 |
| 195 | 1603.5534 | 153.8560 | 1314.9051 | 102.5491 | 669.8464 | 413.4413 |
| 200 | 1629.7267 | 161.9395 | 1355.8358 | 109.2260 | 677.9299 | 406.7644 |
| 205 | 1654.8224 | 170.1514 | 1396.3890 | 116.1068 | 686.1418 | 399.8837 |
| 210 | 1678.8854 | 178.4861 | 1436.5573 | 123.1892 | 694.4765 | 392.8012 |
| 215 | 1701.9590 | 186.9385 | 1476.3347 | 130.4716 | 702.9289 | 385.5188 |
| 220 | 1724.0839 | 195.5039 | 1515.7164 | 137.9519 | 711.4943 | 378.0385 |
| 225 | 1745.3009 | 204.1777 | 1554.7015 | 145.6280 | 720.1681 | 370.3624 |
| 230 | 1765.6498 | 212.9553 | 1593.2850 | 153.4981 | 728.9457 | 362.4923 |
| 235 | 1785.1706 | 221.8327 | 1631.4686 | 161.5600 | 737.8231 | 354.4304 |
| 240 | 1803.8974 | 230.8056 | 1669.2497 | 169.8119 | 746.7960 | 346.1785 |
| 245 | 1821.8667 | 239.8703 | 1706.6309 | 178.2518 | 755.8607 | 337.7386 |
| 250 | 1839.1152 | 249.0230 | 1743.6122 | 186.8775 | 765.0134 | 329.1129 |
| 255 | 1855.6727 | 258.2601 | 1780.1960 | 195.6872 | 774.2505 | 320.3032 |
| 260 | 1871.5709 | 267.5785 | 1816.3850 | 204.6786 | 783.5689 | 311.3118 |
| 265 | 1886.8413 | 276.9747 | 1852.1806 | 213.8501 | 792.9651 | 302.1403 |
| 270 | 1901.5123 | 286.4458 | 1887.5879 | 223.1998 | 802.4362 | 292.7907 |
| 273 | 1910.4595 | 292.4497 | 1909.6954 | 229.1804 | 808.4401 | 286.8100 |
| 275 | 1915.6103 | 295.9888 | 1922.6078 | 232.7253 | 811.9792 | 283.2651 |
| 277 | 1921.5037 | 300.1136 | 1937.5499 | 236.8750 | 816.1040 | 279.1154 |
| 280 | 1929.1622 | 305.6008 | 1957.2469 | 242.4250 | 821.5912 | 273.5654 |
| 285 | 1942.1935 | 315.2795 | 1991.5085 | 252.2970 | 831.2699 | 263.6934 |
| 290 | 1954.7260 | 325.0219 | 2025.3960 | 262.3394 | 841.0123 | 253.6510 |
| 294 | 1963.4545 | 332.0746 | 2049.5655 | 269.6743 | 848.0651 | 246.3161 |
| 295 | 1966.7837 | 334.8258 | 2058.9143 | 272.5502 | 850.8162 | 243.4403 |
| 296 | 1969.1400 | 336.7937 | 2065.5734 | 274.6124 | 852.7842 | 241.3780 |

|      |           |           |           |            |           |            |
|------|-----------|-----------|-----------|------------|-----------|------------|
| 298  | 1974.1462 | 341.0327  | 2079.8436 | 279.0688   | 857.0231  | 236.9216   |
| 300  | 1978.3882 | 344.6888  | 2092.0684 | 282.9278   | 860.6792  | 233.0626   |
| 310  | 2000.3169 | 364.5835  | 2157.3016 | 304.1757   | 880.5740  | 211.8147   |
| 320  | 2020.6650 | 384.6896  | 2221.1337 | 326.0688   | 900.6800  | 189.9216   |
| 330  | 2039.5681 | 404.9920  | 2283.6057 | 348.5935   | 920.9824  | 167.3969   |
| 340  | 2057.1524 | 425.4763  | 2344.7572 | 371.7363   | 941.4667  | 144.2541   |
| 350  | 2073.5295 | 446.1307  | 2404.6284 | 395.4841   | 962.1211  | 120.5063   |
| 360  | 2088.8000 | 466.9431  | 2463.2582 | 419.8244   | 982.9335  | 96.1660    |
| 370  | 2103.0577 | 487.9035  | 2520.6857 | 444.7450   | 1003.8939 | 71.2454    |
| 373  | 2107.3521 | 494.5340  | 2538.5319 | 452.7132   | 1010.5244 | 63.2772    |
| 380  | 2116.3842 | 509.0010  | 2576.9491 | 470.2339   | 1024.9914 | 45.7565    |
| 390  | 2128.8560 | 530.2278  | 2632.0860 | 496.2798   | 1046.2182 | 19.7106    |
| 400  | 2140.5403 | 551.5752  | 2686.1328 | 522.8717   | 1067.5656 | -6.8813    |
| 425  | 2166.7003 | 605.4236  | 2816.7089 | 591.6700   | 1121.4140 | -75.6796   |
| 450  | 2189.1387 | 659.8790  | 2941.2054 | 663.6556   | 1175.8694 | -147.6652  |
| 475  | 2208.5073 | 714.8544  | 3060.0963 | 738.6826   | 1230.8448 | -222.6921  |
| 500  | 2225.3268 | 770.2823  | 3173.8163 | 816.6163   | 1286.2727 | -300.6259  |
| 525  | 2240.0152 | 826.1029  | 3282.7531 | 897.3325   | 1342.0933 | -381.3421  |
| 550  | 2252.9085 | 882.2670  | 3387.2632 | 980.7162   | 1398.2574 | -464.7257  |
| 575  | 2264.2844 | 938.7350  | 3487.6651 | 1066.6603  | 1454.7254 | -550.6699  |
| 600  | 2274.3657 | 995.4703  | 3584.2489 | 1155.0665  | 1511.4607 | -639.0760  |
| 650  | 2291.3581 | 1109.6279 | 3766.9928 | 1338.9016  | 1625.6183 | -822.9111  |
| 700  | 2305.0288 | 1224.5496 | 3937.3180 | 1531.5562  | 1740.5400 | -1015.5658 |
| 750  | 2316.1811 | 1340.0878 | 4096.7413 | 1732.4492  | 1856.0783 | -1216.4588 |
| 800  | 2325.3919 | 1456.1336 | 4246.5272 | 1941.0678  | 1972.1240 | -1425.0774 |
| 850  | 2333.0828 | 1572.6001 | 4387.7409 | 2156.9566  | 2088.5905 | -1640.9662 |
| 900  | 2339.5681 | 1689.4206 | 4521.2845 | 2379.7113  | 2205.4110 | -1863.7209 |
| 950  | 2345.0857 | 1806.5393 | 4647.9311 | 2608.9671  | 2322.5297 | -2092.9767 |
| 1000 | 2349.8183 | 1923.9147 | 4768.3410 | 2844.3971  | 2439.9051 | -2328.4067 |
| 1050 | 2353.9065 | 2041.5090 | 4883.0904 | 3085.7039  | 2557.4994 | -2569.7135 |
| 1100 | 2357.4626 | 2159.2944 | 4992.6782 | 3332.6176  | 2675.2849 | -2816.6271 |
| 1150 | 2360.5731 | 2277.2468 | 5097.5417 | 3584.8900  | 2793.2372 | -3068.8996 |
| 1200 | 2363.3102 | 2395.3448 | 5198.0658 | 3842.2964  | 2911.3352 | -3326.3060 |
| 1250 | 2365.7314 | 2513.5711 | 5294.5906 | 4104.6274  | 3029.5615 | -3588.6370 |
| 1300 | 2367.8832 | 2631.9123 | 5387.4196 | 4371.6901  | 3147.9027 | -3855.6996 |
| 1350 | 2369.8030 | 2750.3548 | 5476.8214 | 4643.3078  | 3266.3452 | -4127.3174 |
| 1400 | 2371.5233 | 2868.8879 | 5563.0371 | 4919.3165  | 3384.8783 | -4403.3261 |
| 1450 | 2373.0715 | 2987.5021 | 5646.2845 | 5199.5591  | 3503.4926 | -4683.5687 |
| 1500 | 2374.4691 | 3106.1916 | 5726.7590 | 5483.8946  | 3622.1820 | -4967.9041 |
| 1550 | 2375.7354 | 3224.9457 | 5804.6385 | 5772.1869  | 3740.9362 | -5256.1965 |
| 1600 | 2376.8853 | 3343.7606 | 5880.0836 | 6064.3154  | 3859.7511 | -5548.3250 |
| 1650 | 2377.9338 | 3462.6315 | 5953.2396 | 6360.1539  | 3978.6219 | -5844.1635 |
| 1700 | 2378.8916 | 3581.5516 | 6024.2422 | 6659.5980  | 4097.5420 | -6143.6076 |
| 1750 | 2379.7696 | 3700.5180 | 6093.2136 | 6962.5416  | 4216.5084 | -6446.5512 |
| 1800 | 2380.5762 | 3819.5259 | 6160.2660 | 7268.8844  | 4335.5163 | -6752.8939 |
| 1850 | 2381.3186 | 3938.5723 | 6225.5008 | 7578.5337  | 4454.5627 | -7062.5433 |
| 1900 | 2382.0029 | 4057.6555 | 6289.0154 | 7891.4018  | 4573.6459 | -7375.4114 |
| 1950 | 2382.6365 | 4176.7704 | 6350.8970 | 8207.4037  | 4692.7608 | -7691.4133 |
| 2000 | 2383.2235 | 4295.9172 | 6411.2287 | 8526.4613  | 4811.9077 | -8010.4709 |
| 2050 | 2383.7681 | 4415.0911 | 6470.0838 | 8848.4975  | 4931.0815 | -8332.5071 |
| 2100 | 2384.2736 | 4534.2919 | 6527.5321 | 9173.4417  | 5050.2823 | -8657.4513 |
| 2150 | 2384.7459 | 4653.5169 | 6583.6409 | 9501.2254  | 5169.5073 | -8985.2350 |
| 2200 | 2385.1857 | 4772.7660 | 6638.4710 | 9831.7812  | 5288.7564 | -9315.7908 |
| 2250 | 2385.5965 | 4892.0334 | 6692.0780 | 10165.0521 | 5408.0238 | -9649.0617 |
| 2300 | 2385.9814 | 5011.3220 | 6744.5143 | 10500.9657 | 5527.3125 | -9984.9753 |

|      |           |           |           |            |           |             |
|------|-----------|-----------|-----------|------------|-----------|-------------|
| 2350 | 2386.3423 | 5130.6290 | 6795.8323 | 10839.4747 | 5646.6194 | -10323.4843 |
| 2400 | 2386.6807 | 5249.9543 | 6846.0760 | 11180.5214 | 5765.9448 | -10664.5309 |
| 2450 | 2386.9991 | 5369.2951 | 6895.2905 | 11524.0573 | 5885.2855 | -11008.0669 |
| 2500 | 2387.2976 | 5488.6522 | 6943.5171 | 11870.0343 | 6004.6427 | -11354.0439 |
| 2550 | 2387.5795 | 5608.0248 | 6990.7943 | 12218.3945 | 6124.0152 | -11702.4041 |
| 2600 | 2387.8455 | 5727.4090 | 7037.1593 | 12569.0897 | 6243.3994 | -12053.0993 |
| 2650 | 2388.0958 | 5846.8057 | 7082.6464 | 12922.0909 | 6362.7961 | -12406.1004 |
| 2700 | 2388.3336 | 5966.2179 | 7127.2870 | 13277.3401 | 6482.2083 | -12761.3497 |
| 2750 | 2388.5581 | 6085.6387 | 7171.1136 | 13634.7989 | 6601.6291 | -13118.8085 |
| 2800 | 2388.7701 | 6205.0711 | 7214.1545 | 13994.4286 | 6721.0615 | -13478.4382 |
| 2850 | 2388.9721 | 6324.5151 | 7256.4355 | 14356.2003 | 6840.5055 | -13840.2098 |
| 2900 | 2389.1634 | 6443.9668 | 7297.9856 | 14720.0657 | 6959.9572 | -14204.0752 |
| 2950 | 2389.3446 | 6563.4282 | 7338.8289 | 15085.9765 | 7079.4186 | -14569.9861 |
| 3000 | 2389.5176 | 6682.9001 | 7378.9880 | 15453.9233 | 7198.8905 | -14937.9329 |

---
